1 **Title: SARS-CoV-2 Omicron subvariant genomic variation associations with immune evasion in**  
2 **Northern California: A retrospective cohort study**

3  
4 **Authors:** Joshua R. Nugent, PhD<sup>1</sup>; Mariah S. Wood, MPH<sup>1</sup>; Liyan Liu, MSc<sup>1</sup>; Teal Bullick<sup>2</sup>; Jeffrey M.  
5 Schapiro, MD<sup>3</sup>; Phacharee Arunleung<sup>2</sup>; Gautham Gautham<sup>2</sup>; Shiffen Getabecha, MPH<sup>2</sup>; Christina  
6 Morales, PhD<sup>2</sup>; Laura B. Amsden, MSW, MPH<sup>1</sup>; Crystal A. Hsiao, MPH<sup>1</sup>; Debra A. Wadford, PhD, MS<sup>2</sup>;  
7 Stacia K. Wyman, PhD, MS<sup>4</sup>; Jacek Skarbinski, MD<sup>1,3,5,6</sup>

8  
9 **Affiliations:**

- 10 1. Division of Research, Kaiser Permanente Northern California, Oakland, CA, 94612  
11 2. Viral and Rickettsial Disease Laboratory, Center for Laboratory Sciences, California Department of  
12 Public Health, Richmond, California, 94804  
13 3. The Permanente Medical Group, Kaiser Permanente Northern California, Oakland, CA, 94612  
14 4. Innovative Genomics Institute, University of California, Berkeley, Berkeley, CA, 94720  
15 5. Department of Infectious Diseases, Oakland Medical Center, Kaiser Permanente Northern California,  
16 Oakland, CA, 94611  
17 6. Physician Researcher Program, Kaiser Permanente Northern California, Oakland, CA, 94612  
18

19 **Running title:** Omicron genomic variation and immune evasion

20 **Word count:** Abstract (249); Manuscript text (2,859)

21  
22 **Corresponding author:**

23 Joshua R. Nugent  
24 Kaiser Permanente Division of Research  
25 4480 Hacienda Drive, Building B  
26 Pleasanton, CA 94588  
27 Email: [joshua.r.nugent@kp.org](mailto:joshua.r.nugent@kp.org)  
28 Mobile: 628-282-1934  
29

30 **Author Contributions:**

- 31  
32 • Joshua R. Nugent; Mariah S. Wood; Liyan Liu; Jeffrey M. Schapiro; Laura B. Amsden; Crystal A. Hsiao;  
33 Stacia K. Wyman; Jacek Skarbinski contributed to conceptual ideas and methodology;  
34 • Joshua R. Nugent; Mariah S. Wood; Liyan Liu; Teal Bullick; Stacia K. Wyman; Jacek Skarbinski  
35 contributed to formal analysis;  
36 • Joshua R. Nugent; Liyan Liu; Stacia K. Wyman; Jacek Skarbinski contributed to writing and original  
37 draft preparation;  
38 • Joshua R. Nugent; Mariah S. Wood; Liyan Liu; Teal Bullick; Jeffrey M. Schapiro; Phacharee  
39 Arunleung; Gautham Gautham; Christina Morales; Laura B. Amsden; Crystal A. Hsiao; Debra A.  
40 Wadford; Stacia K. Wyman; Jacek Skarbinski contributed to writing, reviewing, and editing the  
41 manuscript;  
42 • Jacek Skarbinski; Phacharee Arunleung; Christina Morales; Debra A. Wadford supervised the work.  
43

44 **Declaration of interests:** All authors: No conflicts of interest identified. All authors have submitted the  
45 ICMJE Form for Disclosure of Potential Conflicts of Interest. Conflicts that the editors consider relevant  
46 to the content of the manuscript have been disclosed.  
47

48 **Abstract**

49 **Background:** The possibility of association between SARS-CoV-2 genomic variation and immune evasion  
50 is not known among persons with Omicron variant SARS-CoV-2 infection.

51 **Methods:** In a retrospective cohort, using Poisson regression adjusting for sociodemographic variables  
52 and month of infection, we examined associations between individual non-lineage defining mutations  
53 and SARS-CoV-2 immunity status, defined as a) no prior recorded infection, b) not vaccinated but with at  
54 least one prior recorded infection, c) complete primary series vaccination, and/or d) primary series  
55 vaccination and  $\geq 1$  booster. We identified all non-synonymous single nucleotide polymorphisms (SNPs),  
56 insertions and deletions in SARS-CoV-2 genomes with  $\geq 5\%$  allelic frequency and population frequency of  
57  $\geq 5\%$  and  $\leq 95\%$ . We also examined correlations between the presence of SNPs with each other, with  
58 subvariants, and over time.

59 **Results:** Seventy-nine mutations met inclusion criteria. Among 15,566 persons infected with Omicron  
60 SARS-CoV-2, 1,825 (12%) were unvaccinated with no prior recorded infection, 360 (2%) were  
61 unvaccinated with a recorded prior infection, 13,381 (86%) had a complete primary series vaccination,  
62 and 9,172 (58%) had at least one booster. After examining correlation between SNPs, 79 individual non-  
63 lineage defining mutations were organized into 38 groups. After correction for multiple testing, no  
64 individual SNPs or SNP groups were significantly associated with immunity status levels.

65 **Conclusions:** Genomic variation identified within SARS-CoV-2 Omicron specimens was not significantly  
66 associated with immunity status, suggesting that contribution of non-lineage defining SNPs to immune  
67 evasion is minimal. Larger-scale surveillance of SARS-CoV-2 genomes linked with clinical data can help  
68 provide information to inform future vaccine development.

69

70 **Key words:** SARS-CoV-2; genomic variation; immune evasion

71

## 72 **Background**

73           Since its emergence, severe acute respiratory syndrome coronavirus 2 (SARS-CoV-2) has been  
74 evolving, with evidence for increased transmissibility and ability to evade existing immune responses  
75 elicited by prior infection or COVID-19 vaccination.<sup>1,2</sup> Multiple mutations that increase transmission and  
76 immune evasion were identified when the Delta and subsequent Omicron variants (and sub-variants)  
77 emerged. However, few in-depth analyses characterizing the genomic variation within a circulating  
78 variant and identifying potential mutations associated with immune evasion have been conducted. In  
79 addition, during the Omicron wave, individual immunity could be due to prior infection or multiple levels  
80 of vaccination, due to the availability of vaccine boosters in this timeframe, and any immune evasion  
81 characteristics found among mutations could be tied to a specific type of immunity, derived from, for  
82 example, prior infection, immunization dose(s), or both.

83           To address these data gaps, we conducted a retrospective cohort study of persons with nucleic-  
84 acid amplification test (NAAT)-confirmed SARS-CoV-2 infection with the Omicron variant confirmed by  
85 whole genome sequencing. Patients were members of a large, integrated health system that had  
86 detailed epidemiologic and clinical data on all participants. The study assessed overall SARS-CoV-2  
87 genetic variation over time as well as the relationship between mutations and the individual's source(s)  
88 of potential COVID-19 immunity. The key assumption in this study is that after adjusting for  
89 sociodemographic characteristics and timeframe, an association between mutation presence and  
90 vaccine- or infection-derived immunity could imply greater immune evasion for that mutation.

91

## 92 **Methods**

### 93 *Setting*

94           Kaiser Permanente Northern California (KPNC) is an integrated health system that serves over  
95 4.5 million members in Northern and Central California and provides comprehensive preventive and

96 curative care in inpatient and outpatient settings across 266 medical offices and 21 hospitals. Members  
97 receive most clinical services, including laboratory testing, outpatient, and inpatient care in KPNC  
98 facilities. Members have similar sociodemographic characteristics to the population of Northern and  
99 Central California.<sup>3</sup> SARS-CoV-2 NAAT for outpatients and hospitalized patients is conducted at a  
100 regional laboratory or local hospital laboratories using various platforms and specimens are sent to the  
101 California Department of Public Health (CDPH) for whole genome sequencing.

102

### 103 *Study design*

104 We conducted a retrospective cohort study of persons with NAAT-confirmed SARS-CoV-2  
105 infection and whole genome sequencing-confirmed Omicron variant infection and assessed patterns  
106 among non-lineage-defining mutations as well as the association between SARS-CoV-2 genetic variation  
107 and immunity source (if any). This immunity was defined by prior reported SARS-CoV-2 infection or  
108 vaccination. Epidemiologic and clinical data were obtained from the KPNC Virtual Data Warehouse, a  
109 common data model into which standardized data are extracted from clinical and administrative  
110 databases including an integrated electronic health record database (Epic, Verona, WI, USA), and from  
111 other sources.<sup>4,5</sup> The study was approved by the KPNC and University of California, Berkeley Institutional  
112 Review Boards with waivers of the requirement for informed consent. This activity was reviewed by the  
113 Centers for Disease Control and Prevention (CDC) and conducted consistent with applicable federal law  
114 and CDC policy (see e.g., 45 C.F.R. part 46.102(l)(2), 21 C.F.R. part 56; 42 U.S.C. §241(d); 5 U.S.C. §552a;  
115 44 U.S.C. §3501 et seq.).

116

### 117 *Inclusion criteria*

118 We included all persons with an incident NAAT-confirmed SARS-CoV-2 infection and whole  
119 genome sequencing-confirmed Omicron variant infection from January 1, 2022 to October 31, 2022 who

120 met the following criteria: 1) KPNC membership for at least one year prior to SARS-CoV-2 diagnosis; 2)  
121 aged  $\geq 5$  years and  $< 90$  years; 3) no prior receipt of COVID-19 vaccine or the completion of a primary  
122 COVID-19 vaccine series of two doses of BNT162b2 [Pfizer/BioNTech] or m-RNA-1973  
123 [Moderna/National Institutes of Health] or one dose of Ad.26.COV2.s [Janssen] more than 14 days prior  
124 to index date; 4) incident infection defined as the first NAAT-confirmed SARS-CoV-2 infection during the  
125 study period. The index date was defined as the date of NAAT-confirmation of SARS-CoV-2 infection.

126

### 127 *SARS-CoV-2 whole genome sequencing and processing*

128 KPNC is a partner in COVIDNet with CDPH and submits a majority of NAAT-confirmed SARS-CoV-  
129 2 specimens to COVIDNet for genomic surveillance; a subset of specimens undergo whole genome  
130 sequencing at CDPH or affiliated laboratories based on CDPH priorities, including prioritizing hospitalized  
131 cases and a convenience sample of the first specimens received per week (number varies by burden).<sup>6</sup>  
132 COVIDNet consists of a set of (primarily University of California-affiliated) laboratories tapped to assist  
133 CDPH because they had surplus sequencing capacity. Illumina sequencing was used by most of the sites,  
134 with about 10% of genomes being sequenced by Oxford Nanopore. For this study, we only included  
135 Illumina-sequenced genomes because the error rate of Nanopore is too high to accurately identify low-  
136 frequency mutations. Varying sets of primers were used by different institutions, but the most common  
137 for the Omicron genomes were the ARTICv3 and ARTICv4 primers. The University of California, San  
138 Francisco lab used their own custom set of primers with more primers and shorter amplicons. After  
139 sequencing, the CDPH Viral and Rickettsial Disease Laboratory links lineage information with patient  
140 identifiers and shares the results with KPNC. The raw sequence files are shared with the University of  
141 California, Berkeley (UCB); KPNC and UCB collaborate further to link demographic, clinical, and  
142 epidemiologic data from KPNC with subsequent sequence analysis data from UCB.

143           The raw sequencing data were processed through a SARS-CoV-2 analysis pipeline that was  
144 modified for this work as follows. Adapter removal and trimming were performed using bbduk  
145 (<http://sourceforge.net/projects/bbmap/>). The reads were then aligned to the Wuhan reference  
146 genome (GISAID ID: EPI\_ISL\_402125, GenBank accession number MN908947) using minimap2<sup>7</sup> followed  
147 by primer trimming using iVar.<sup>8</sup> Samtools was used to create a pileup file from which a consensus  
148 sequence was generated. This consensus genome was created with iVar using a minimum depth of 10  
149 reads and majority rule for base calling. We next used iVar to call variants from the pileup file where we  
150 set the sensitivity threshold for calling a mutation to 2%. This process calls mutations for any loci where  
151 at least 2% of the reads are non-reference. Using this very low threshold allowed us to capture even  
152 very low frequency mutations in the sequencing data. This threshold resulted in many spurious  
153 mutations from sequencing and alignment errors and therefore we later set a threshold of 5% when  
154 processing mutations. This original list of variants was then annotated with the gene and amino acid  
155 change (if there was one) or insertion or deletion.

156           After calling with iVar using a low-frequency threshold, mutations were compiled into a master  
157 frequency matrix listing all mutations that appeared in any genome in rows, and all the genomes that  
158 each mutation appeared in columns ([https://github.com/staciawyman/SC2\\_GenVar](https://github.com/staciawyman/SC2_GenVar)). The cell values  
159 were frequency of the alternate reads at the location. A mutation had to have an allele frequency of at  
160 least 5% to be included to rule out sequencing errors. This matrix was partitioned into variant-specific  
161 parts to facilitate analysis. We constructed an Omicron matrix including all individuals that had the  
162 Omicron lineage<sup>9</sup> between January 1, 2022 and October 31, 2022 including non-synonymous SNPs,  
163 insertions and deletions (indels). Pipeline code is available at  
164 [https://github.com/staciawyman/SC2\\_GenVar](https://github.com/staciawyman/SC2_GenVar).

165

166 *Outcome measure*

167           The primary outcome measure was, among persons with an incident NAAT-confirmed SARS-  
168 CoV-2 infection, the presence of individual mutations (nonsynonymous SNPs, insertions and deletions)  
169 with  $\geq 5\%$  allelic frequency and  $\geq 5\%$  and  $\leq 95\%$  population frequency, as well as mutation groups created  
170 by grouping SNPs with a pairwise Pearson correlation coefficient  $> 0.7$ . Additionally, patterns in the  
171 prevalence of these mutations were assessed as follows: as noted earlier, pairwise Pearson correlations  
172 with other mutations in each infection; presence within Omicron subvariant (BA.1, BA.2, BA.4, BA.5,  
173 BCD, BE, BF, Bdot), and prevalence over time.

174

175 *Primary exposure: SARS-CoV-2 immunity status*

176           The primary exposure of interest in this analysis was immunity level, defined in mutually  
177 exclusive categories: i) no recorded vaccination or recorded prior infection; ii) recorded prior infection  
178 but no recorded vaccination; and iii) recorded vaccination (primary series complete and/or more than  
179 primary series), regardless of prior infection status.

180

181 *Statistical analysis*

182           Adjusted relative prevalence, shown as an adjusted rate ratio (aRR), and 95% confidence  
183 intervals (CIs) for the estimates for our exposure and adjustment variables were obtained from modified  
184 Poisson regression models with robust standard errors using PROC GENMOD with a log link function in  
185 SAS (Version 9.4, Cary, North Carolina); statistical significance was defined as a p-value  $< 0.05$ . All p-  
186 values were adjusted for multiple comparisons to control the false discovery rate at 5%, using the  
187 Benjamini-Hochberg procedure.<sup>10</sup> To adjust for confounding, all models included age category, sex,  
188 race/ethnicity, Charlson comorbidity index score<sup>11</sup>, and index month. Adjusting for these demographic  
189 and clinical factors accounted for differential vaccination status of these subgroups, increasing

190 vaccination rates over time, and the inherent uncertainty as to where in a population a new mutation  
191 might arise.

192

### 193 *Data Availability*

194 De-identified data that underlie the results reported in this article will be made available upon  
195 reasonable request.

196

### 197 *Role of funding source*

198 The funders had no role in study design, data collection, data analysis, interpretation, or writing  
199 of the report.

200

## 201 **Results**

202 From January 1, 2022 to October 31, 2022, 312,249 SARS-CoV-2-positive specimens were  
203 submitted for sequencing, 18,603 (6.0%) underwent sequencing (Supplemental Figure 1), and 18,476  
204 (5.9%) had reported lineages consistent with the Omicron variant. After applying selection criteria,  
205 15,556 persons with SARS-CoV-2 Omicron variant infection were included in the analysis: 9,172 (58%)  
206 vaccinated with a booster; 4,209 (26%) vaccinated with a complete primary series [two doses of Pfizer or  
207 Moderna vaccine]; and 2,185 (14%) with no vaccination (Supplemental Figure 1). The prevalence of  
208 Omicron subvariants in our specimens, aggregated to the week level, showed increasing diversity over  
209 time (Figure 1).

210 After applying selection criteria to the sequences, we identified 78 non-lineage defining  
211 mutations (all non-synonymous SNPs) in 1,456 SARS-CoV-2 SNPs included in this analysis, shown in  
212 Supplemental Figure 2. Identified mutations were in the spike gene (n=44), nucleocapsid gene (n=8)  
213 open reading frame 1a (ORF1a) (n=19), ORF1b (n=4), ORF3a (n=1), ORF6c (n=1), ORF10 (n=1). The



214 population frequency within our genomes of individual identified mutations ranged from 5.0% to 95.0%  
215 and 46 out of 79 (58.2%) mutations were present in <50% of the overall population. Although we called  
216 low-frequency mutations with our pipeline, none of them met the criteria for inclusion in our analysis.

217         Of the 78 identified SNPs that met our inclusion criteria, many co-occurred on the same  
218 specimens. Supplemental Figure 2 shows the pairwise correlations of SNP presence in our dataset. Given  
219 the strong pairwise correlations observed, we formed groups of SNPs that had a pairwise Pearson  
220 correlation  $> .7$ , reducing the dimension to 33 SNPs/SNP groups, also shown in Supplemental Figure 2.  
221 These mutation groups are largely monophyletic and segregate together across the phylogeny of  
222 Omicron genomes (Supplemental Figure 3).

223         The demographics of persons with SARS-CoV-2 infection included in this analysis, stratified by  
224 vaccination and prior infection status, are shown in Table 1, and the number of total reported infections  
225 and those sequenced over time is shown in Supplemental Figure 4. Significant differences were found  
226 between groups, thus supporting their inclusion in our covariate adjustment set. Figure 2 details some  
227 of the relationships between SNP groups, time, and subvariant among the specimens in our data set.  
228 While certain mutations/groups appear essentially only in a single subvariant (for example, 99.1% of  
229 S:H69L mutations appear in specimens classified as BA.1 in Figure 2c), the majority of mutations/groups  
230 appear in many subvariants, suggesting that they are not simply proxy measures of subvariant. Further,  
231 the presence of mutations/groups do not follow clear temporal patterns (Figure 2b). While some  
232 mutations such as Group 12 arise, become plentiful, then wane, others disappear and re-appear over  
233 time without a clear pattern (for example, S:D1259H). Smoothed over time, grouped SNP prevalence by  
234 month is shown in Supplemental Figure 5.

235         Using modified Poisson regression models with robust standard errors, we found several of our  
236 33 SNP groupings (Table 2) and/or 78 individual mutations (Supplemental Table 1) that were  
237 significantly associated with immunity status; however, after correcting p-values to adjust for multiple

238 comparisons, none of the associations were statistically significant. These findings were not  
239 meaningfully changed when people with a booster vaccine were/were not aggregated with the  
240 complete primary series group (Supplemental Table 2, Supplemental Table 3). The SNPs/groups with the  
241 largest absolute associations with vaccination (Table 2) included some that were strongly associated  
242 with a single variant (for example, ORF10:L37F, which occurred almost exclusively in BA.5 subvariants)  
243 as well as some that frequently appeared in multiple variants (for example, ORF1b:N498I and group 45).

244 When looking at the evolutionary relationships with the genomes colored by vaccination status  
245 (Supplemental Figure 6), vaccination status did not show a correlation with a clade/subvariant or  
246 distance from the root (number of mutations with respect to the reference SARS-CoV-2 genome).

247

## 248 **Discussion**

249 Characterizing the continuing evolution of SARS-CoV-2, along with active surveillance of  
250 infections, is critical to targeting public health measures and vaccine development. Large-scale global  
251 whole genome sequencing efforts have contributed substantially to our understanding of the genetic  
252 variation of SARS-CoV-2 and its associations with transmissibility and immune evasion. Our current study  
253 adds to this evidence base by assessing within-variant (Omicron) variation in the genome beyond the  
254 already-identified subvariants such as BA.1 and BA.2 using a unique whole genome surveillance system  
255 linking genomic data with detailed data on demographic, clinical and epidemiologic characteristics in a  
256 well-defined population.

257 Understanding the potential for immune evasion based on mutations beyond the spike protein  
258 is critical for vaccine development and understanding the mechanisms of the human immune response.  
259 In this detailed analysis of genomic variation within the Omicron variant over a 10-month period in  
260 California, we identified only 78 mutations that met our inclusion criteria among 15,566 genomes. These  
261 mutations occurred across the entire genome, not just in the spike protein. Spike protein mutations

262 previously implicated with immune evasion were excluded based on population frequency. We  
263 encourage future research to examine the entire viral genome for potential immune evasion or  
264 increased replication or infectivity.

265 Our results showed that there appear to be some mutations that are tightly grouped with  
266 certain subvariants, while a number of other mutations appear across multiple subvariants. While we  
267 did not find evidence for immune evasion among our identified mutations/groups after correction for  
268 multiple testing, it is possible that we are underpowered to detect small effects over a short time  
269 period.<sup>12</sup> Many of the SNPs with the highest adjusted risk ratios appeared in a small number of  
270 specimens (Supplemental Table 1). While one would expect more variability from the smallest table cells  
271 if we were simply observing statistical noise, it is also possible that a larger sample could confirm these  
272 stronger adjusted risk ratios.

273 Our analysis has several limitations. First, not all possible demographic and clinical variables  
274 were included in our models, and if those variables are associated with immunity status and SNP  
275 presence, unmeasured confounding could bias our analysis. Second, there is a risk of misclassification of  
276 immunity status; though the KPNC surveillance system for vaccination is quite robust, prior infections  
277 (say, diagnosed by a home test) may have gone unreported. Third, we focused on a set of specimens  
278 from Northern and Central California, limiting the generalizability of our findings to this context. Finally,  
279 there may be hidden bias as to which specimens were successfully sequenced based on the nucleic acid  
280 viral load in the specimen (e.g., specimens with lower viral loads might not be successfully sequenced  
281 and thus would have been excluded from this analysis). Fourth, although our surveillance system has a  
282 very robust system for assessing individual-level vaccination status, there is a small risk of  
283 misclassification of persons as having incorrect immunity status.

284 As part of the global effort to conduct near real-time genomic surveillance for SARS-CoV-2, there  
285 has been tremendous progress in developing national genomic surveillance systems with nearly real-

286 time public reporting of circulating SARS-CoV-2 variants and uploading of consensus sequence data to  
287 publicly available genomic databases.<sup>13 14 15 16</sup> However, these efforts can be improved. First, enhancing  
288 methods to define consensus sequences to also assess for minor variation with <50% allelic frequency  
289 would better define the true genomic variation of circulating SARS-CoV-2, including capturing within-  
290 host genetic diversity.<sup>17,18</sup> Second, current SARS-CoV-2 genomic surveillance systems in the United  
291 States have limited metadata on human demographics, clinical factors, epidemiologic factors, and  
292 immunity status (e.g. COVID-19 vaccination and documented prior infection), particularly when  
293 compared to the United Kingdom.<sup>19</sup> This limits the ability to correlate noted patterns in SARS-CoV-2  
294 genetic variation and real-world clinical and epidemiologic outcomes in the United States. We present  
295 one potential analysis that uses this data linkage to better understand how SARS-CoV-2 genetic variation  
296 might be associated with human disease, in this case evidence for immune evasion associated with  
297 specific mutation clusters. Improving the clinical metadata associated with SARS-CoV-2 genomic data  
298 should be a priority as we continue to improve and expand genomic surveillance. We have  
299 demonstrated this capability through partnership and collaboration between a large healthcare system  
300 and a state public health department, namely KPNC and CDPH/COVIDNet.

301 In summary, we demonstrate that linking SARS-CoV-2 genomic sequence data with detailed  
302 clinical data revealed no significant associations between genetic variation among Omicron SARS-CoV-2  
303 mutations and immunity status. Further research using larger sample sets that link SARS-CoV-2 genetic  
304 data with clinical data is warranted for the potential to reveal whether SARS-CoV-2 non-lineage defining  
305 genetic variation might contribute to the fitness of SARS-CoV-2 by either immune evasion or other  
306 mechanism.

307

308 **Funding Statement:** This study was supported by the Rockefeller Foundation (SKW, JS), National Cancer  
309 Institute of the National Institutes of Health under Award Number U01CA260584 as part of the  
310 Serological Sciences Network (SeroNet) (JS), the Physician Researcher Program of The Permanente  
311 Medical Group Delivery Science and Applied Research Program (JS), The Packard Foundation (SKW), and  
312 The Sergey Brin Family Foundation (SKW). CDPH/COVIDNet genomic surveillance work was funded by  
313 Centers for Disease Control and Prevention, Epidemiology and Laboratory Capacity for Infectious  
314 Diseases, Cooperative Agreement Number 5 NU50CK000539.

315  
316 **Declaration of interests:** All authors: No conflicts of interest identified. All authors have submitted the  
317 ICMJE Form for Disclosure of Potential Conflicts of Interest. Conflicts that the editors consider relevant  
318 to the content of the manuscript have been disclosed.

319  
320 **Acknowledgments:** The authors are grateful to all Kaiser Permanente members without whom this  
321 study would not have been possible. In addition, we wish to acknowledge our partnership with the  
322 California Department of Public Health and participation in the California SARS-CoV-2 Whole Genome  
323 Sequencing Initiative (COVIDNet). We thank the VRDL and COVIDNet Teams: Summer Adams, Allison  
324 Bailey, Matt Bacinskas, Nikki Baumrind, Elizabeth Baylis, John Bell, Ricardo Berumen III, Yocelyn Cruz,  
325 Mojgan Deldari, Alex Espinosa, Sabrina Gilliam, Madeline Glenn, Bianca Gonzaga, Melanie Greengard, Jill  
326 Hacker, Kim Hansard, Monica Haw, Thalia Huynh, Chantha Kath, Ruth Lopez, Sharon Messenger, Alexa  
327 Quintana, Chris Preas, Clarence Reyes, Maria Salas, Hilary Tamnanchit, Serena Ting, Kathy Jacobson, MD,  
328 and Carol Glaser, MD.

329  
330 **Data sharing statement:** De-identified data that underlie the results reported in this article will be made  
331 available upon reasonable request.

332

333 **Disclaimer:** The content is solely the responsibility of the authors and does not represent the official  
334 views or opinions of the National Institutes of Health, Kaiser Permanente, California Department of  
335 Public Health or the California Health and Human Services Agency.

336

337 **\*Additional Disclaimer:** Use of trade names and commercial sources is for identification only and does  
338 not imply endorsement by the California Department of Public Health or the California Health and  
339 Human Services Agency.

340

341 **References**

- 342 1. Lou F, Li M, Pang Z, et al. Understanding the Secret of SARS-CoV-2 Variants of Concern/Interest and  
343 Immune Escape. *Front Immunol*. 2021;12. Accessed November 13, 2023.  
344 <https://www.frontiersin.org/articles/10.3389/fimmu.2021.744242>
- 345 2. Harvey WT, Carabelli AM, Jackson B, et al. SARS-CoV-2 variants, spike mutations and immune  
346 escape. *Nat Rev Microbiol*. 2021;19(7):409-424. doi:10.1038/s41579-021-00573-0
- 347 3. Davis AC, Voelkel JL, Remmers CL, Adams JL, McGlynn EA. Comparing Kaiser Permanente Members  
348 to the General Population: Implications for Generalizability of Research. *Perm J*. 2023;27(2):87-98.  
349 doi:10.7812/TPP/22.172
- 350 4. Ross TR, Ng D, Brown JS, et al. The HMO Research Network Virtual Data Warehouse: A Public Data  
351 Model to Support Collaboration. *EGEMS Wash DC*. 2014;2(1):1049. doi:10.13063/2327-9214.1049
- 352 5. Weeks J, Pardee R. Learning to Share Health Care Data: A Brief Timeline of Influential Common Data  
353 Models and Distributed Health Data Networks in U.S. Health Care Research. *EGEMS Wash DC*.  
354 2019;7(1):4. doi:10.5334/egems.279
- 355 6. Wadford DA, Baumrind N, Baylis EF, et al. Implementation of California COVIDNet – a multi-sector  
356 collaboration for statewide SARS-CoV-2 genomic surveillance. *Front Public Health*. 2023;11.  
357 Accessed November 26, 2023. <https://www.frontiersin.org/articles/10.3389/fpubh.2023.1249614>
- 358 7. Li H. Minimap2: pairwise alignment for nucleotide sequences. *Bioinforma Oxf Engl*.  
359 2018;34(18):3094-3100. doi:10.1093/bioinformatics/bty191
- 360 8. Grubaugh ND, Gangavarapu K, Quick J, et al. An amplicon-based sequencing framework for  
361 accurately measuring intrahost virus diversity using PrimalSeq and iVar. *Genome Biol*. 2019;20(1):8.  
362 doi:10.1186/s13059-018-1618-7
- 363 9. O’Toole Á, Scher E, Underwood A, et al. Assignment of epidemiological lineages in an emerging  
364 pandemic using the pangolin tool. *Virus Evol*. 2021;7(2):veab064. doi:10.1093/ve/veab064

- 365 10. Benjamini Y, Hochberg Y. Controlling the False Discovery Rate: A Practical and Powerful Approach to  
366 Multiple Testing. *J R Stat Soc Ser B Methodol.* 1995;57(1):289-300. doi:10.1111/j.2517-  
367 6161.1995.tb02031.x
- 368 11. Charlson ME, Pompei P, Ales KL, MacKenzie CR. A new method of classifying prognostic comorbidity  
369 in longitudinal studies: development and validation. *J Chronic Dis.* 1987;40(5):373-383.  
370 doi:10.1016/0021-9681(87)90171-8
- 371 12. Volz E. Fitness, growth and transmissibility of SARS-CoV-2 genetic variants. *Nat Rev Genet.*  
372 2023;24(10):724-734. doi:10.1038/s41576-023-00610-z
- 373 13. Chen Z, Azman AS, Chen X, et al. Global landscape of SARS-CoV-2 genomic surveillance and data  
374 sharing. *Nat Genet.* 2022;54(4):499-507. doi:10.1038/s41588-022-01033-y
- 375 14. World Health Organization. *Guidance for Surveillance of SARS-CoV-2 Variants: Interim Guidance, 9*  
376 *August 2021.* World Health Organization; 2021. <https://apps.who.int/iris/handle/10665/343775>
- 377 15. Lambrou AS. Genomic Surveillance for SARS-CoV-2 Variants: Predominance of the Delta (B.1.617.2)  
378 and Omicron (B.1.1.529) Variants — United States, June 2021–January 2022. *MMWR Morb Mortal*  
379 *Wkly Rep.* 2022;71. doi:10.15585/mmwr.mm7106a4
- 380 16. Robishaw JD, Alter SM, Solano JJ, et al. Genomic surveillance to combat COVID-19: challenges and  
381 opportunities. *Lancet Microbe.* 2021;2(9):e481-e484. doi:10.1016/S2666-5247(21)00121-X
- 382 17. Tonkin-Hill G, Martincorena I, Amato R, et al. Patterns of within-host genetic diversity in SARS-CoV-  
383 2. Neher RA, Sawyer SL, Neher RA, Luring AS, eds. *eLife.* 2021;10:e66857. doi:10.7554/eLife.66857
- 384 18. Gao R, Zu W, Liu Y, et al. Quasispecies of SARS-CoV-2 revealed by single nucleotide polymorphisms  
385 (SNPs) analysis. *Virulence.* 2021;12(1):1209-1226. doi:10.1080/21505594.2021.1911477
- 386 19. Nicholls SM, Poplawski R, Bull MJ, et al. CLIMB-COVID: continuous integration supporting  
387 decentralised sequencing for SARS-CoV-2 genomic surveillance. *Genome Biol.* 2021;22(1):196.  
388 doi:10.1186/s13059-021-02395-y
- 389



**Figure 1. SARS-CoV-2-positive specimens tested by Kaiser Permanente Northern California, proportion by subvariant, by week from January 1, 2022 to October 31, 2022**

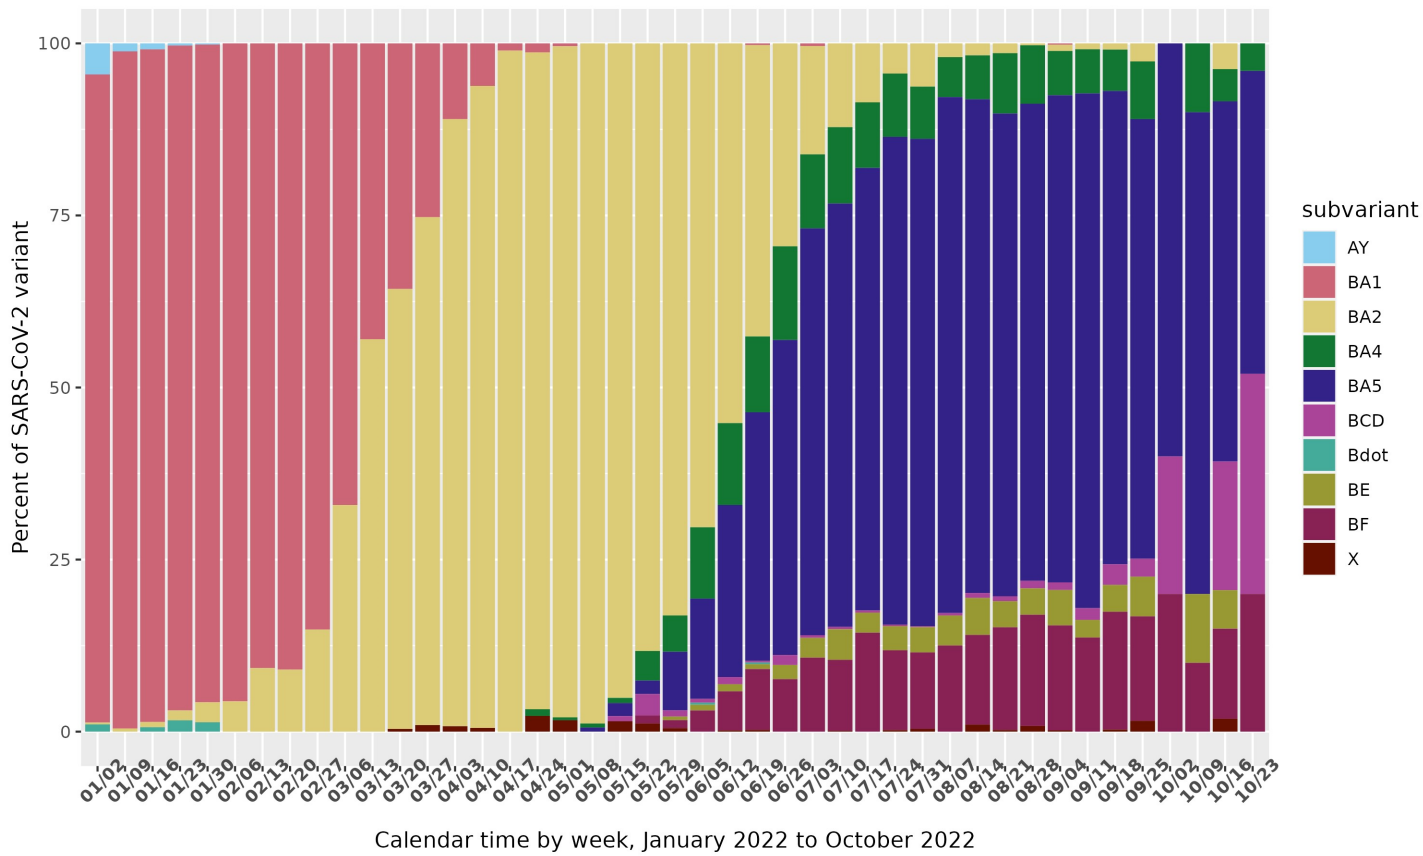

**Figure 2: SNP/group prevalence by subvariant and week in 2022**

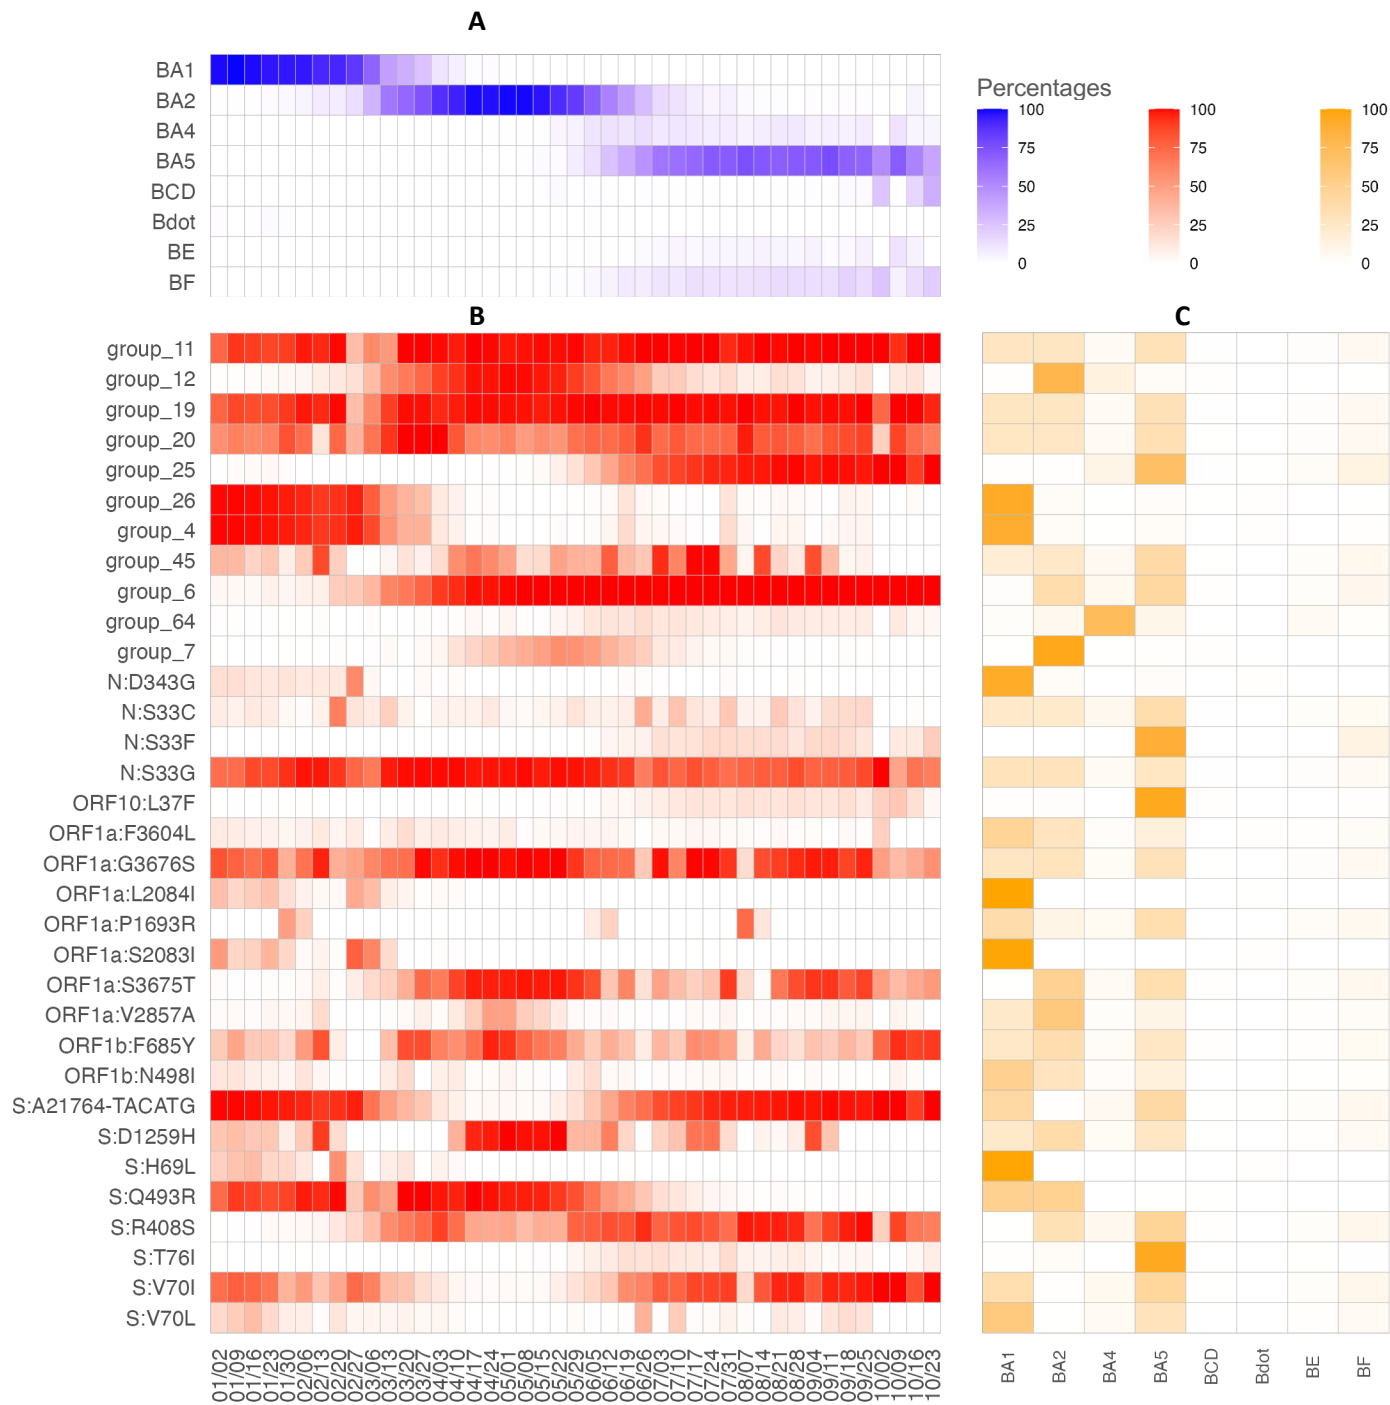

- (A) Proportion of specimens in each sublineage by week
- (B) Proportion of specimens with a given SNP/group by week
- (C) Proportion of subvariant by SNP/group (rows sum to 100%)

**Table 1: Demographics of persons included in this analysis with SARS-CoV-2 infection with Omicron variant in Northern California stratified by vaccination/infection status, January 1, 2022 - October 31, 2022**

| Characteristic                                               | All<br>n (%)      | Not vaccinated,<br>no prior reported<br>infection<br>n (%) | Not vaccinated,<br>prior reported<br>infection<br>n (%) | Vaccinated<br>n (%) | p-value <sup>1</sup> |
|--------------------------------------------------------------|-------------------|------------------------------------------------------------|---------------------------------------------------------|---------------------|----------------------|
| <b>Total</b>                                                 | 15,566 (100%)     | 1,825 (11.7%)                                              | 360 (2.3%)                                              | 13,381 (86.0%)      |                      |
| <b>Median age in years (Interquartile range)</b>             | 43.0 (30.0, 57.0) | 32.0 (13.0, 49.0)                                          | 32.0 (19.0, 43.0)                                       | 44.0 (32.0, 58.0)   | <0.0001              |
| <b>Age in years</b>                                          |                   |                                                            |                                                         |                     | <0.0001              |
| 5-19                                                         | 2,019 (13.0%)     | 594 (32.5%)                                                | 95 (26.4%)                                              | 1,330 (9.9%)        |                      |
| 20-29                                                        | 1,776 (11.4%)     | 219 (12.0%)                                                | 57 (15.8%)                                              | 1,500 (11.2%)       |                      |
| 30-39                                                        | 3,054 (19.6%)     | 323 (17.7%)                                                | 97 (26.9%)                                              | 2,634 (19.7%)       |                      |
| 40-49                                                        | 2,859 (18.4%)     | 242 (13.3%)                                                | 53 (14.7%)                                              | 2,564 (19.2%)       |                      |
| 50-59                                                        | 2,572 (16.5%)     | 189 (10.4%)                                                | 35 (9.7%)                                               | 2,348 (17.5%)       |                      |
| 60-69                                                        | 1,879 (12.1%)     | 135 (7.4%)                                                 | 13 (3.6%)                                               | 1,731 (12.9%)       |                      |
| 70-79                                                        | 1,023 (6.6%)      | 88 (4.8%)                                                  | 8 (2.2%)                                                | 927 (6.9%)          |                      |
| 80-89                                                        | 384 (2.5%)        | 35 (1.9%)                                                  | 2 (0.6%)                                                | 347 (2.6%)          |                      |
| <b>Sex</b>                                                   |                   |                                                            |                                                         |                     | 0.0003               |
| Female                                                       | 8,665 (55.7%)     | 929 (50.9%)                                                | 204 (56.7%)                                             | 7,532 (56.3%)       |                      |
| Male                                                         | 6,901 (44.3%)     | 896 (49.1%)                                                | 156 (43.3%)                                             | 5,849 (43.7%)       |                      |
| <b>Race/ethnicity</b>                                        |                   |                                                            |                                                         |                     | <0.0001              |
| LatinX/Hispanic ethnicity                                    | 4,303 (27.6%)     | 591 (32.4%)                                                | 158 (43.9%)                                             | 3,554 (26.6%)       |                      |
| Black/African descent                                        | 1,368 (8.8%)      | 267 (14.6%)                                                | 45 (12.5%)                                              | 1,056 (7.9%)        |                      |
| Asian descent                                                | 4,090 (26.3%)     | 211 (11.6%)                                                | 38 (10.6%)                                              | 3,841 (28.7%)       |                      |
| White/European or middle eastern descent                     | 4,788 (30.8%)     | 603 (33.0%)                                                | 100 (27.8%)                                             | 4,085 (30.5%)       |                      |
| Other/unknown                                                | 1,017 (6.5%)      | 153 (8.4%)                                                 | 19 (5.3%)                                               | 845 (6.3%)          |                      |
| <b>Charlson comorbidity index score</b>                      |                   |                                                            |                                                         |                     | 0.44                 |
| Score 0                                                      | 10,082 (64.8%)    | 1,218 (66.7%)                                              | 271 (75.3%)                                             | 8,593 (64.2%)       |                      |
| Score 1                                                      | 2,278 (14.6%)     | 225 (12.3%)                                                | 48 (13.3%)                                              | 2,005 (15.0%)       |                      |
| Score 2                                                      | 881 (5.7%)        | 60 (3.3%)                                                  | 4 (1.1%)                                                | 817 (6.1%)          |                      |
| Score 3+                                                     | 1,141 (7.3%)      | 118 (6.5%)                                                 | 11 (3.1%)                                               | 1,012 (7.6%)        |                      |
| Missing (no visits in prior year)                            | 1,184 (7.6%)      | 204 (11.2%)                                                | 26 (7.2%)                                               | 954 (7.1%)          |                      |
| <b>COVID-19 vaccination</b>                                  |                   |                                                            |                                                         |                     |                      |
| None                                                         | 2,185 (14.0%)     | 1,825 (100.0%)                                             | 360 (100.0%)                                            |                     |                      |
| Complete primary series                                      |                   |                                                            |                                                         |                     |                      |
| Johnson & Johnson                                            | 803 (5.2%)        |                                                            |                                                         | 803 (6.0%)          |                      |
| Moderna                                                      | 4,359 (28.0%)     |                                                            |                                                         | 4,359 (32.6%)       |                      |
| Pfizer                                                       | 8,219 (52.8%)     |                                                            |                                                         | 8,219 (61.4%)       |                      |
| <b>Month of SARS-CoV-2 infection</b>                         |                   |                                                            |                                                         |                     | 0.007                |
| January 2022                                                 | 3,120 (20.0%)     | 663 (36.3%)                                                | 65 (18.1%)                                              | 2,392 (17.9%)       |                      |
| February 2022                                                | 1,280 (8.2%)      | 250 (13.7%)                                                | 26 (7.2%)                                               | 1,004 (7.5%)        |                      |
| March 2022                                                   | 791 (5.1%)        | 92 (5.0%)                                                  | 13 (3.6%)                                               | 686 (5.1%)          |                      |
| April 2022                                                   | 1,090 (7.0%)      | 88 (4.8%)                                                  | 10 (2.8%)                                               | 992 (7.4%)          |                      |
| May 2022                                                     | 1,210 (7.8%)      | 95 (5.2%)                                                  | 21 (5.8%)                                               | 1,094 (8.2%)        |                      |
| June 2022                                                    | 1,837 (11.8%)     | 152 (8.3%)                                                 | 53 (14.7%)                                              | 1,632 (12.2%)       |                      |
| July 2022                                                    | 2,770 (17.8%)     | 212 (11.6%)                                                | 75 (20.8%)                                              | 2,483 (18.6%)       |                      |
| August 2022                                                  | 2,263 (14.5%)     | 182 (10.0%)                                                | 62 (17.2%)                                              | 2,019 (15.1%)       |                      |
| September 2022                                               | 1,070 (6.9%)      | 83 (4.5%)                                                  | 32 (8.9%)                                               | 955 (7.1%)          |                      |
| October 2022                                                 | 135 (0.9%)        | 8 (0.4%)                                                   | 3 (0.8%)                                                | 124 (0.9%)          |                      |
| <b>Months from last vaccine dose to SARS-CoV-2 infection</b> |                   |                                                            |                                                         |                     |                      |
| Mean (standard deviation)                                    | 6.5 (3.7)         |                                                            |                                                         | 6.5 (3.7)           |                      |

| <b>Characteristic</b>                                             | <b>All<br/>n (%)</b> | <b>Not vaccinated,<br/>no prior reported<br/>infection<br/>n (%)</b> | <b>Not vaccinated,<br/>prior reported<br/>infection<br/>n (%)</b> | <b>Vaccinated<br/>n (%)</b> | <b>p-value<sup>1</sup></b> |
|-------------------------------------------------------------------|----------------------|----------------------------------------------------------------------|-------------------------------------------------------------------|-----------------------------|----------------------------|
| Median (25 <sup>th</sup> percentile, 75 <sup>th</sup> percentile) | 6.3 (3.7, 8.6)       |                                                                      |                                                                   | 6.3 (3.7, 8.6)              |                            |
| <b>Immune compromising conditions<sup>2</sup></b>                 |                      |                                                                      |                                                                   |                             |                            |
| Any immune compromising condition                                 | 1,092 (7.0%)         | 92 (5.0%)                                                            | 16 (4.4%)                                                         | 984 (7.4%)                  | 0.0009                     |
| <b>Severe clinical outcomes</b>                                   |                      |                                                                      |                                                                   |                             |                            |
| Any hospitalization                                               | 483 (3.1%)           | 164 (9.0%)                                                           | 5 (1.4%)                                                          | 314 (2.3%)                  | <0.0001                    |

<sup>1</sup>Wilcoxon rank sum test; Pearson's Chi-squared test

<sup>2</sup>Immune compromising conditions: HIV, organ transplant, cancer, rheumatologic/inflammatory conditions, and other immune deficiencies.

**Table 2: Association between mutation groups<sup>1</sup> and vaccine status (pooling over complete and boosted) among persons included in this analysis with SARS-CoV-2 infection with Omicron variant in Northern California, January 1, 2022 - October 31, 2022 (N=15,566)<sup>2</sup>**

| SNP/group       | Not vaccinated, no recorded prior infection | Not vaccinated, recorded prior infection |         |         | Vaccinated, regardless of prior infection status |         |         |
|-----------------|---------------------------------------------|------------------------------------------|---------|---------|--------------------------------------------------|---------|---------|
|                 |                                             | aRR (95% CI)                             | p (raw) | p (FDR) | aRR (95% CI)                                     | p (raw) | p (FDR) |
| group64         | Reference                                   | 1.26 ( 0.82- 1.93)                       | 0.2845  | 0.97743 | 1.22 ( 0.96- 1.56)                               | 0.1097  | 0.72385 |
| ORF10:L37F      | Reference                                   | 1.00 ( 0.61- 1.62)                       | 0.9849  | 0.98491 | 1.18 ( 0.91- 1.53)                               | 0.2210  | 0.86611 |
| ORF1b:N498I     | Reference                                   | 0.96 ( 0.57- 1.63)                       | 0.8889  | 0.97743 | 1.13 ( 0.92- 1.40)                               | 0.2404  | 0.86611 |
| group45         | Reference                                   | 1.13 ( 0.96- 1.34)                       | 0.1504  | 0.97743 | 1.10 ( 1.01- 1.19)                               | 0.0282  | 0.46532 |
| ORF1a:V2857A    | Reference                                   | 1.38 ( 0.84- 2.29)                       | 0.2047  | 0.97743 | 1.09 ( 0.86- 1.39)                               | 0.4703  | 0.90946 |
| S:D1259H        | Reference                                   | 1.06 ( 0.87- 1.29)                       | 0.5509  | 0.97743 | 1.08 ( 0.99- 1.19)                               | 0.0834  | 0.68786 |
| S:T76I          | Reference                                   | 1.25 ( 0.80- 1.95)                       | 0.3219  | 0.97743 | 1.07 ( 0.83- 1.40)                               | 0.5906  | 0.91512 |
| N:S33C          | Reference                                   | 1.07 ( 0.78- 1.45)                       | 0.6751  | 0.97743 | 1.06 ( 0.92- 1.24)                               | 0.4194  | 0.89674 |
| group25         | Reference                                   | 1.04 ( 0.88- 1.23)                       | 0.6343  | 0.97743 | 1.04 ( 0.95- 1.14)                               | 0.4105  | 0.89674 |
| S:V70L          | Reference                                   | 0.89 ( 0.62- 1.29)                       | 0.5376  | 0.97743 | 1.04 ( 0.90- 1.20)                               | 0.6297  | 0.91512 |
| group7          | Reference                                   | 0.95 ( 0.66- 1.36)                       | 0.7830  | 0.97743 | 1.04 ( 0.87- 1.24)                               | 0.6892  | 0.91512 |
| ORF1a:F3604L    | Reference                                   | 0.98 ( 0.59- 1.64)                       | 0.9420  | 0.97743 | 1.04 ( 0.84- 1.28)                               | 0.7322  | 0.91512 |
| group19         | Reference                                   | 1.02 ( 0.91- 1.15)                       | 0.6952  | 0.97743 | 1.03 ( 0.98- 1.09)                               | 0.2357  | 0.86611 |
| N:S33G          | Reference                                   | 0.97 ( 0.85- 1.10)                       | 0.6454  | 0.97743 | 1.03 ( 0.98- 1.09)                               | 0.2335  | 0.86611 |
| ORF1a:G3676S    | Reference                                   | 1.02 ( 0.90- 1.16)                       | 0.7179  | 0.97743 | 1.03 ( 0.97- 1.09)                               | 0.4073  | 0.89674 |
| ORF1b:F685Y     | Reference                                   | 1.01 ( 0.84- 1.21)                       | 0.9202  | 0.97743 | 1.03 ( 0.95- 1.12)                               | 0.4348  | 0.89674 |
| S:H69L          | Reference                                   | 0.61 ( 0.36- 1.03)                       | 0.0638  | 0.97743 | 1.03 ( 0.88- 1.19)                               | 0.7379  | 0.91512 |
| group11         | Reference                                   | 0.99 ( 0.88- 1.11)                       | 0.8721  | 0.97743 | 1.02 ( 0.97- 1.08)                               | 0.4105  | 0.89674 |
| S:Q493R         | Reference                                   | 0.92 ( 0.78- 1.10)                       | 0.3603  | 0.97743 | 1.02 ( 0.95- 1.09)                               | 0.6063  | 0.91512 |
| group12         | Reference                                   | 0.92 ( 0.74- 1.15)                       | 0.4770  | 0.97743 | 1.02 ( 0.92- 1.13)                               | 0.6863  | 0.91512 |
| S:V70I          | Reference                                   | 1.03 ( 0.89- 1.19)                       | 0.6590  | 0.97743 | 1.01 ( 0.95- 1.08)                               | 0.6802  | 0.91512 |
| S:A21764-TACATG | Reference                                   | 1.04 ( 0.92- 1.18)                       | 0.5241  | 0.97743 | 1.01 ( 0.95- 1.07)                               | 0.8278  | 0.93114 |
| group6          | Reference                                   | 0.99 ( 0.86- 1.13)                       | 0.8384  | 0.97743 | 1.01 ( 0.94- 1.08)                               | 0.7811  | 0.92055 |
| S:R408S         | Reference                                   | 1.01 ( 0.87- 1.18)                       | 0.8820  | 0.97743 | 1.01 ( 0.93- 1.09)                               | 0.8725  | 0.93114 |
| ORF1a:S3675T    | Reference                                   | 0.96 ( 0.80- 1.16)                       | 0.7049  | 0.97743 | 1.01 ( 0.92- 1.10)                               | 0.9048  | 0.93114 |
| group20         | Reference                                   | 1.00 ( 0.88- 1.15)                       | 0.9478  | 0.97743 | 1.00 ( 0.94- 1.07)                               | 0.9311  | 0.93114 |
| group26         | Reference                                   | 1.06 ( 0.88- 1.29)                       | 0.5288  | 0.97743 | 0.99 ( 0.92- 1.06)                               | 0.7487  | 0.91512 |
| ORF1a:P1693R    | Reference                                   | 1.06 ( 0.68- 1.63)                       | 0.8043  | 0.97743 | 0.99 ( 0.81- 1.21)                               | 0.9139  | 0.93114 |
| group4          | Reference                                   | 1.06 ( 0.88- 1.28)                       | 0.5443  | 0.97743 | 0.98 ( 0.91- 1.05)                               | 0.4961  | 0.90946 |
| N:D343G         | Reference                                   | 0.59 ( 0.31- 1.11)                       | 0.1019  | 0.97743 | 0.90 ( 0.75- 1.08)                               | 0.2628  | 0.86611 |
| N:S33F          | Reference                                   | 1.34 ( 0.94- 1.92)                       | 0.1096  | 0.97743 | 0.89 ( 0.71- 1.11)                               | 0.2887  | 0.86611 |
| ORF1a:S2083I    | Reference                                   | 1.06 ( 0.74- 1.53)                       | 0.7369  | 0.97743 | 0.87 ( 0.76- 1.00)                               | 0.0431  | 0.47401 |
| ORF1a:L2084I    | Reference                                   | 0.90 ( 0.58- 1.39)                       | 0.6213  | 0.97743 | 0.84 ( 0.72- 0.97)                               | 0.0177  | 0.46532 |

<sup>1</sup> Mutations with Pearson pairwise correlation >0.70 combined into groups for analysis:

group 4: M:D3G, ORF1a:I3758V, ORF1a:K856R, S:A67V, S:G496S, S:N211I, S:N856K, S:R346K, S:S371P, S:T22204+GAGCCAGAA, S:T547K, S:T95I  
group 6: N:S413R, ORF1a:F3677L, ORF1a:G1307S, ORF1a:L3027F, ORF1a:S135R, ORF1a:T3090I, ORF1a:T842I, ORF1b:R1315C, ORF1b:T2163I, ORF3a:T223I, S:D405N, S:G142D, S:L24S, S:T19I, S:T376A, S:V213G  
group 7: S:L452Q, S:S704L  
group 11: S:E484A, S:N501Y, S:Q498R, S:S477N, S:T478K, S:Y505H  
group 12: ORF1a:L3201F, ORF6:D61L  
group 19: S:S371F, S:S373P, S:S375F  
group 20: S:K417N, S:N440K  
group 25: M:D3N, S:F486V, S:L452R  
group 26: ORF1a:A2710T, ORF1a:L3674F, S:G21986-GTGTATT, S:G22193-ATT, S:G446S, S:L981F  
group 45: S:A27S, S:C1254\*  
group 64: N:P151S, ORF1a:F143L

<sup>2</sup> Adjusted risk ratios derived from Poisson regression models to assess the association of immunity status with each mutation group adjusting for age, sex, race/ethnicity, Charlson comorbidity index score, and month of SARS-CoV-2 infection.

### Supplemental Figure 1. Cohort flowchart

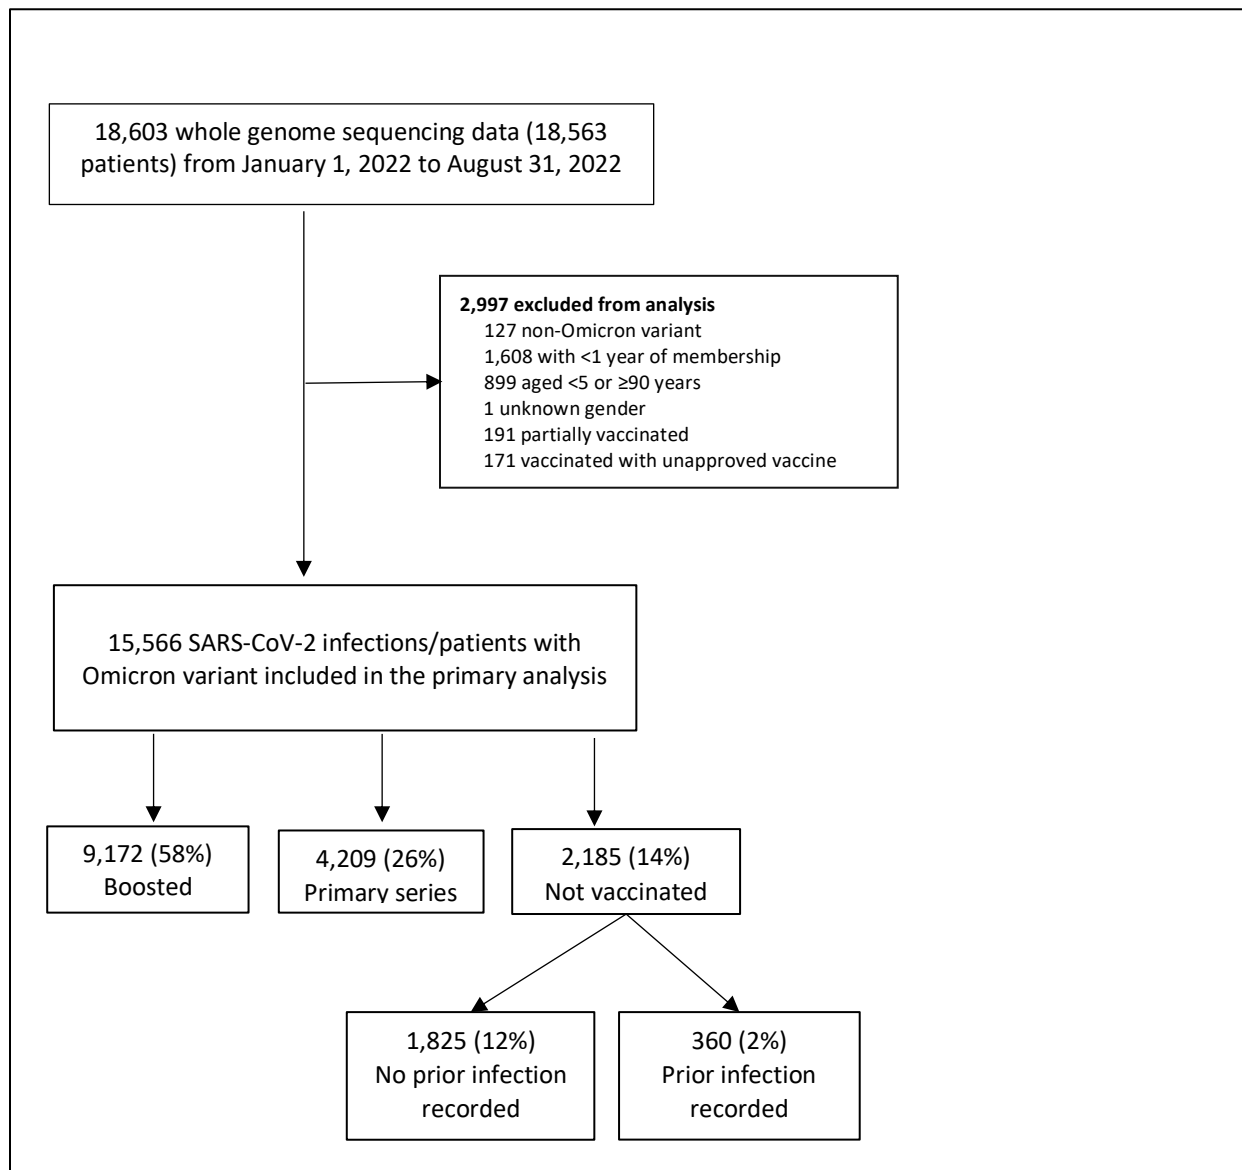

**Supplemental Figure 2: Pearson correlations of SNP presence in specimens, before and after clustering.**

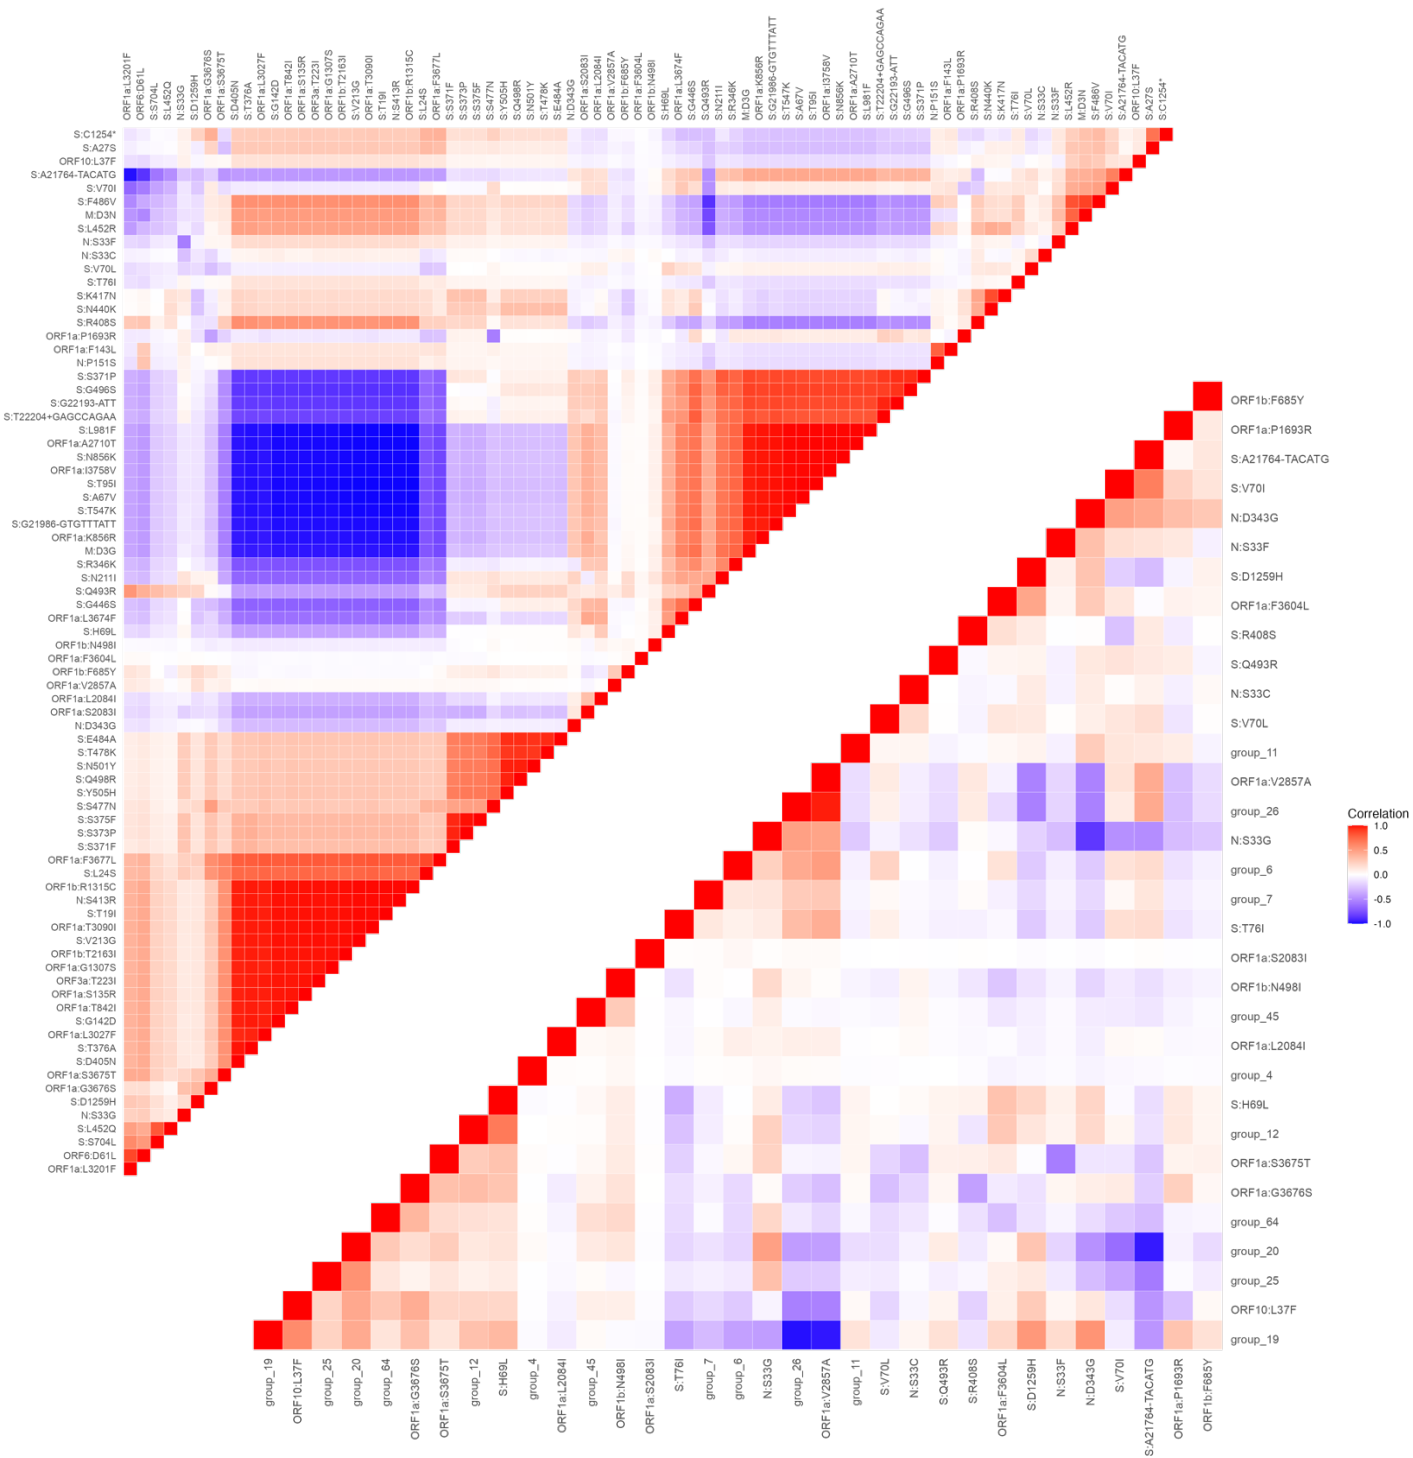



**Supplemental Figure 3. Phylogenies of 15,045 Omicron genomes colored by group. Mutations in group 52 (top) represent a clade defined by the BA.2.12.1 subvariant (in blue). Mutations in group 4 (bottom) fall into a subclade of BA.4 (in yellow).**

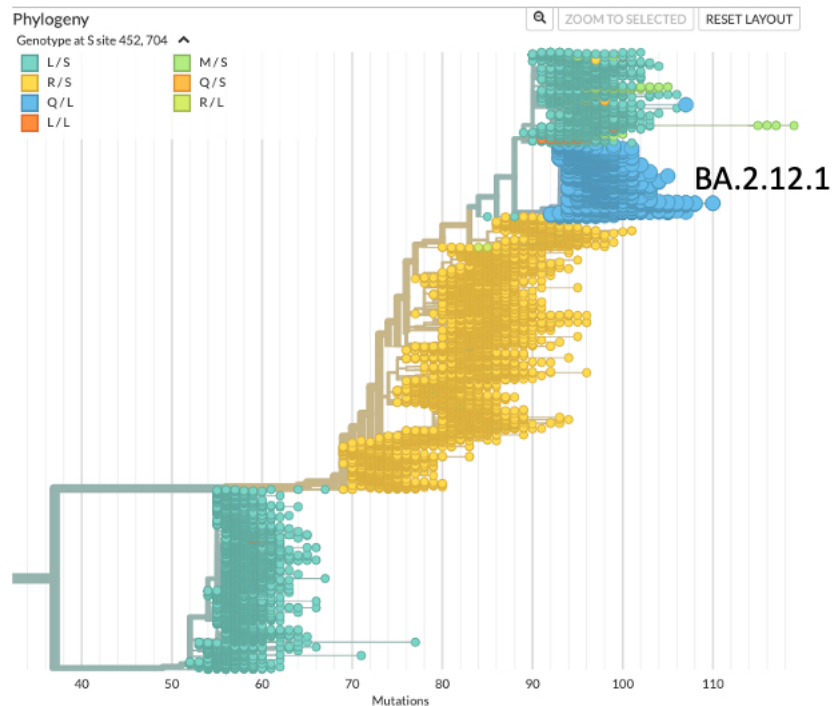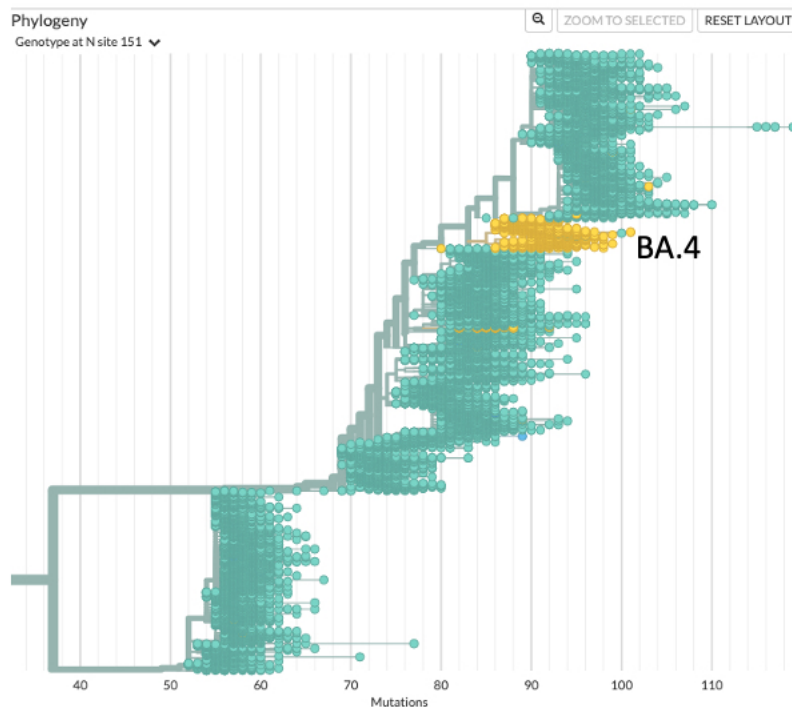

### Supplemental Figure 4. Persons with SARS-CoV-2 infection tested by Kaiser Permanente Northern California stratified by subvariant by week from January 1, 2022 to October 31, 2022

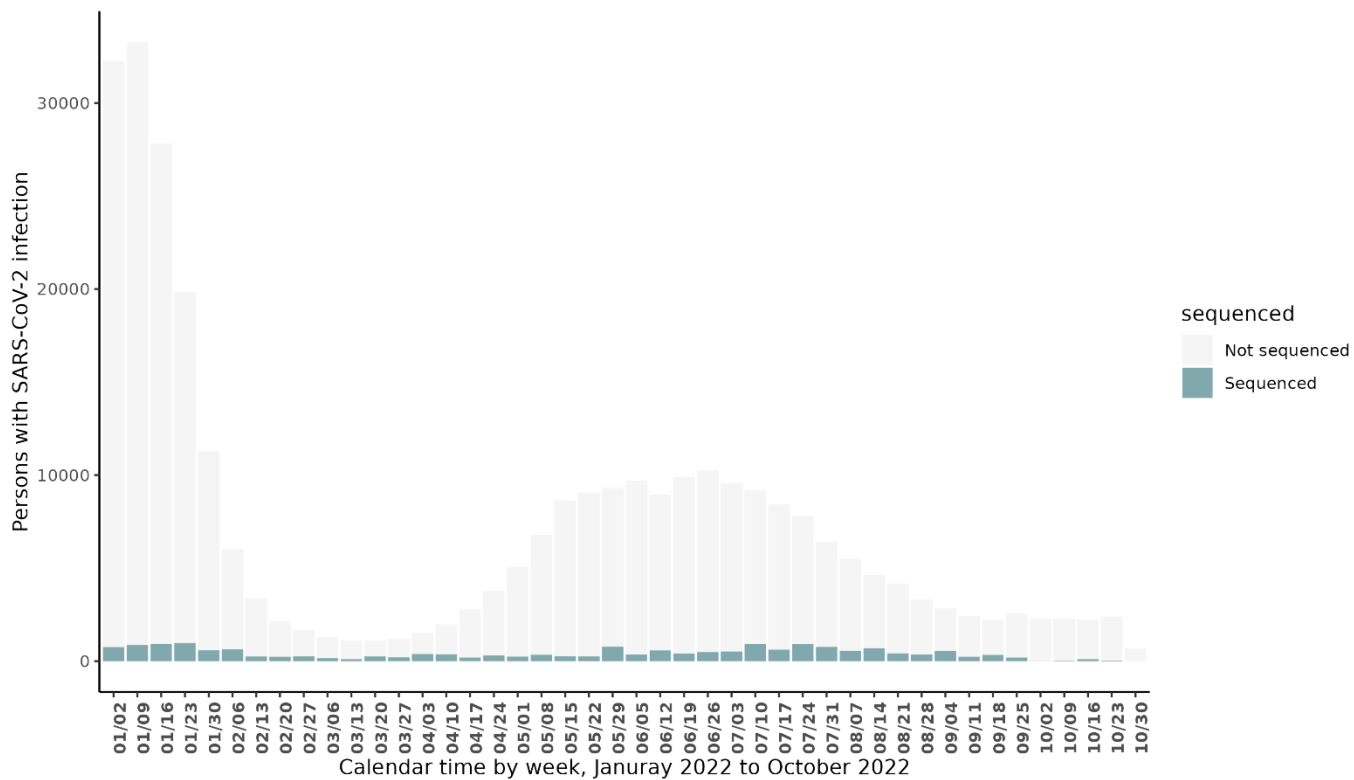

### Supplemental Figure 5. Proportion of specimens with a given SNP or group, by month of 2022

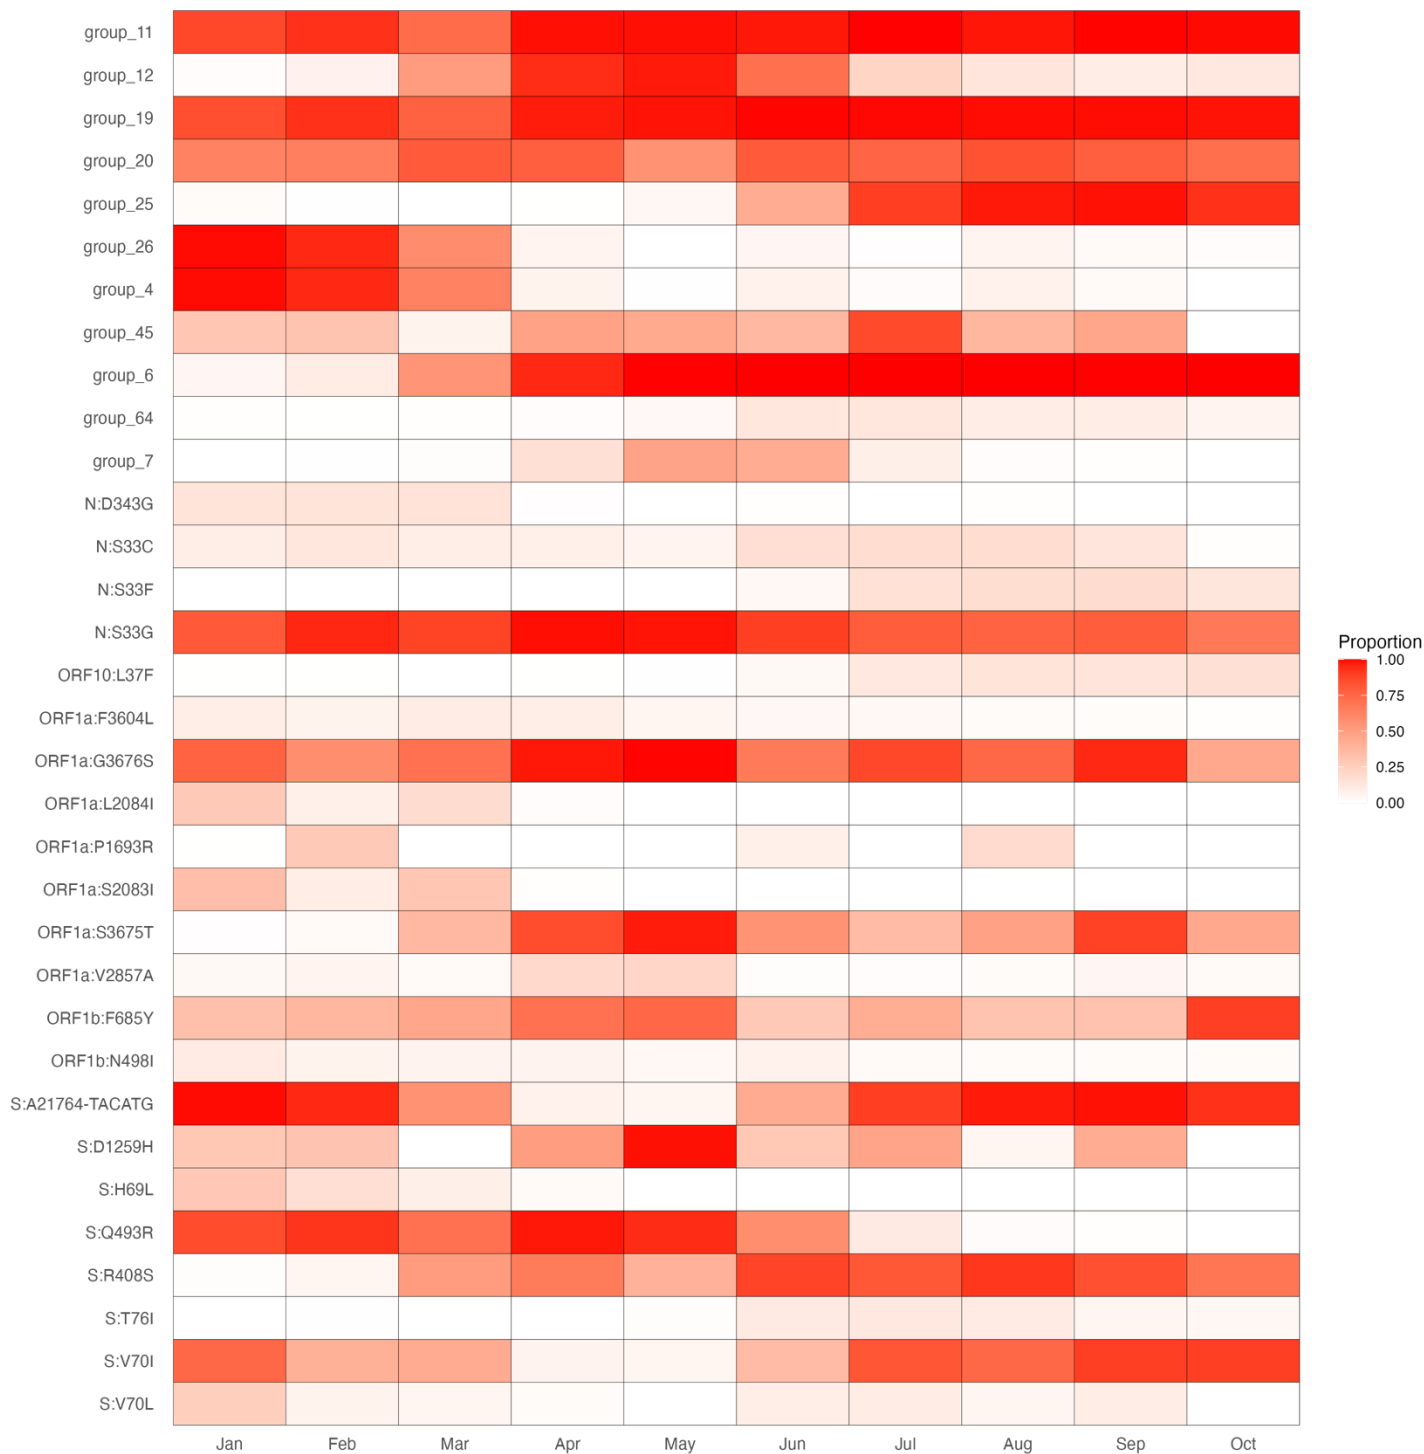

**Supplemental Figure 6. Phylogeny of 15,045 Omicron genomes sampled between 1/1/2022 and 9/25/22. Branch lengths represent divergence from Wuhan reference genome and nodes are colored by vaccination status. Vaccinated category includes primary series and primary plus booster.**

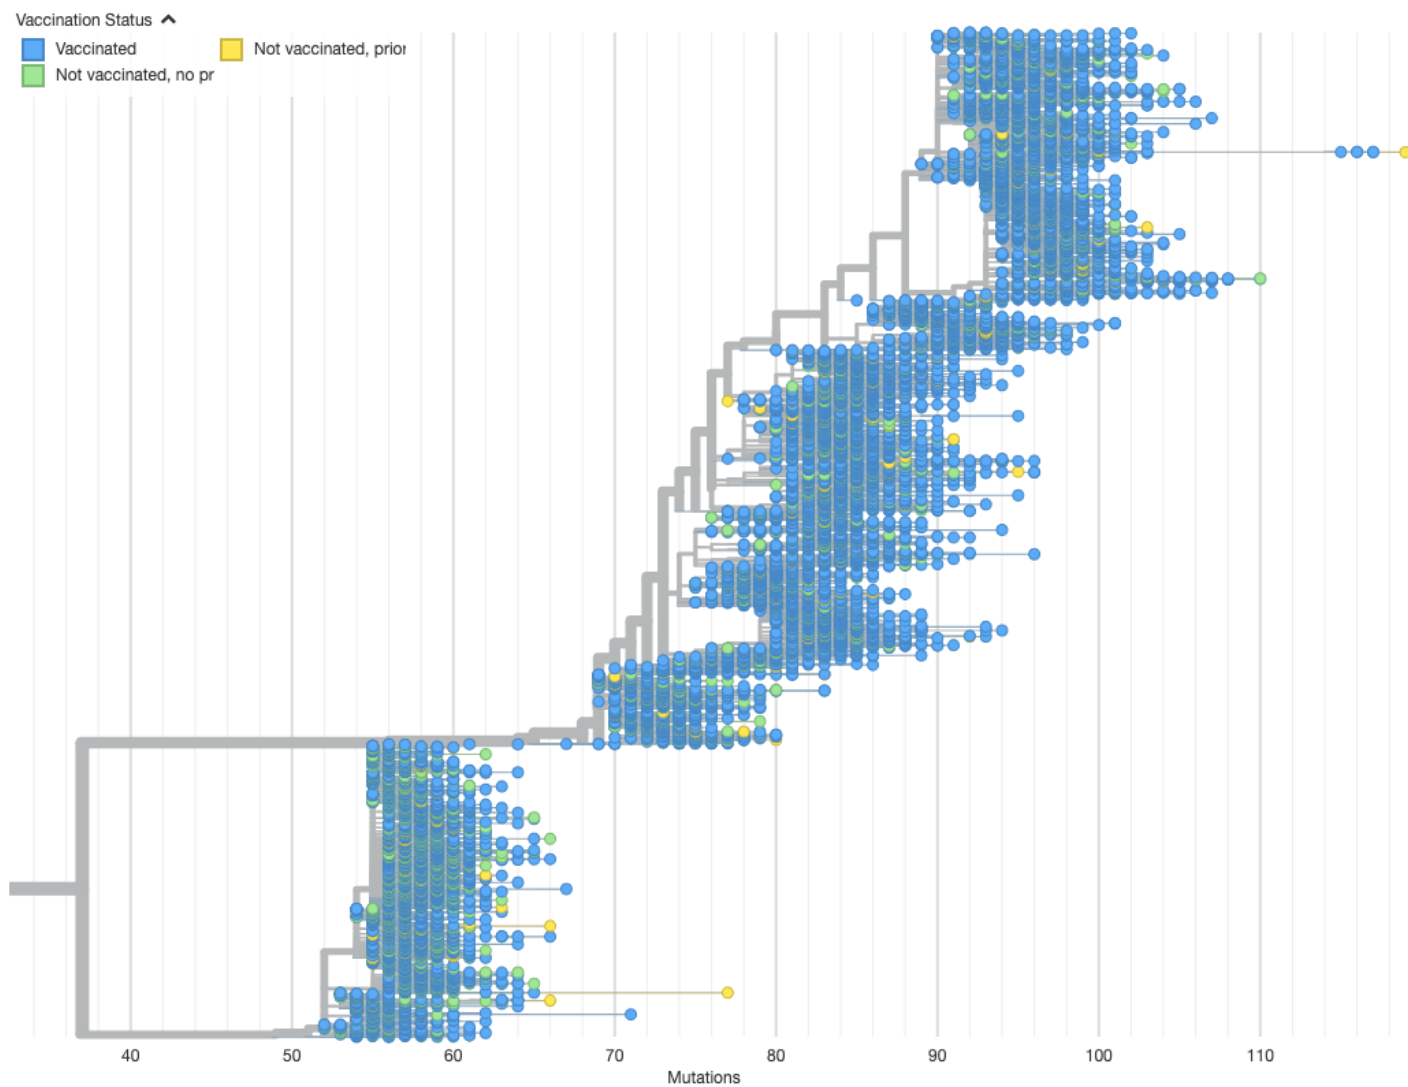

**Supplemental Table 1: Association between SNP presence and vaccine status (pooling over complete and boosted) among persons included in this analysis with SARS-CoV-2 infection with Omicron variant in Northern California, January 1, 2022 - October 31, 2022 (N=15,566).**

| SNP                | Not vaccinated, no recorded prior infection |                      | Not vaccinated, recorded prior infection |                      | Vaccinated, regardless of prior infection status |                      |
|--------------------|---------------------------------------------|----------------------|------------------------------------------|----------------------|--------------------------------------------------|----------------------|
|                    | N (%)                                       | Adjusted RR (95% CI) | N (%)                                    | Adjusted RR (95% CI) | N (%)                                            | Adjusted RR (95% CI) |
| ORF1A:F143L        | 53 ( 2.9%)                                  | Reference            | 24 ( 6.7%)                               | 1.38 ( 0.85- 2.25)   | 705 ( 5.3%)                                      | 1.29 ( 0.97- 1.72)   |
| N:P151S            | 65 ( 3.6%)                                  | Reference            | 26 ( 7.2%)                               | 1.19 ( 0.75- 1.87)   | 773 ( 5.8%)                                      | 1.18 ( 0.91- 1.54)   |
| ORF10:L37F         | 63 ( 3.5%)                                  | Reference            | 22 ( 6.1%)                               | 1.00 ( 0.61- 1.62)   | 820 ( 6.1%)                                      | 1.18 ( 0.91- 1.53)   |
| ORF1B:N498I        | 113 ( 6.2%)                                 | Reference            | 16 ( 4.4%)                               | 0.96 ( 0.57- 1.63)   | 729 ( 5.4%)                                      | 1.13 ( 0.92- 1.40)   |
| S:N211I            | 499 (27.3%)                                 | Reference            | 57 (15.8%)                               | 1.11 ( 0.84- 1.46)   | 2,132 (15.9%)                                    | 1.12 ( 1.01- 1.24)   |
| S:C1254*           | 615 (33.7%)                                 | Reference            | 164 (45.6%)                              | 1.15 ( 0.97- 1.37)   | 5,506 (41.1%)                                    | 1.11 ( 1.02- 1.21)   |
| ORF1A:V2857A       | 82 ( 4.5%)                                  | Reference            | 19 ( 5.3%)                               | 1.38 ( 0.84- 2.29)   | 744 ( 5.6%)                                      | 1.09 ( 0.86- 1.39)   |
| S:D1259H           | 561 (30.7%)                                 | Reference            | 121 (33.6%)                              | 1.06 ( 0.87- 1.29)   | 4,756 (35.5%)                                    | 1.08 ( 0.99- 1.19)   |
| S:T76I             | 64 ( 3.5%)                                  | Reference            | 28 ( 7.8%)                               | 1.25 ( 0.80- 1.95)   | 755 ( 5.6%)                                      | 1.07 ( 0.83- 1.40)   |
| N:S33C             | 209 (11.5%)                                 | Reference            | 51 (14.2%)                               | 1.07 ( 0.78- 1.45)   | 1,770 (13.2%)                                    | 1.06 ( 0.92- 1.24)   |
| S:T22204+GAGCCAGAA | 742 (40.7%)                                 | Reference            | 84 (23.3%)                               | 1.07 ( 0.85- 1.34)   | 3,088 (23.1%)                                    | 1.05 ( 0.97- 1.15)   |
| S:G22193-ATT       | 780 (42.7%)                                 | Reference            | 88 (24.4%)                               | 1.07 ( 0.86- 1.34)   | 3,237 (24.2%)                                    | 1.05 ( 0.97- 1.14)   |
| S:S371P            | 785 (43.0%)                                 | Reference            | 91 (25.3%)                               | 1.10 ( 0.88- 1.36)   | 3,254 (24.3%)                                    | 1.05 ( 0.96- 1.13)   |
| S:F486V            | 505 (27.7%)                                 | Reference            | 186 (51.7%)                              | 1.04 ( 0.88- 1.23)   | 5,949 (44.5%)                                    | 1.04 ( 0.95- 1.14)   |
| S:V70L             | 235 (12.9%)                                 | Reference            | 33 ( 9.2%)                               | 0.89 ( 0.62- 1.29)   | 1,325 ( 9.9%)                                    | 1.04 ( 0.90- 1.20)   |
| ORF1A:F3604L       | 112 ( 6.1%)                                 | Reference            | 17 ( 4.7%)                               | 0.98 ( 0.59- 1.64)   | 709 ( 5.3%)                                      | 1.04 ( 0.84- 1.28)   |
| N:S33G             | 1,513 (82.9%)                               | Reference            | 286 (79.4%)                              | 0.97 ( 0.85- 1.10)   | 11,437 (85.5%)                                   | 1.03 ( 0.98- 1.09)   |
| S:S371F            | 1,626 (89.1%)                               | Reference            | 341 (94.7%)                              | 1.02 ( 0.91- 1.15)   | 12,659 (94.6%)                                   | 1.03 ( 0.98- 1.09)   |
| S:S373P            | 1,628 (89.2%)                               | Reference            | 342 (95.0%)                              | 1.02 ( 0.91- 1.15)   | 12,717 (95.0%)                                   | 1.03 ( 0.98- 1.09)   |
| S:S375F            | 1,629 (89.3%)                               | Reference            | 343 (95.3%)                              | 1.03 ( 0.91- 1.15)   | 12,727 (95.1%)                                   | 1.03 ( 0.98- 1.09)   |
| S:K417N            | 1,180 (64.7%)                               | Reference            | 254 (70.6%)                              | 1.03 ( 0.90- 1.18)   | 9,298 (69.5%)                                    | 1.03 ( 0.97- 1.10)   |
| ORF1A:G3676S       | 1,376 (75.4%)                               | Reference            | 285 (79.2%)                              | 1.02 ( 0.90- 1.16)   | 10,715 (80.1%)                                   | 1.03 ( 0.97- 1.09)   |
| S:E484A            | 1,640 (89.9%)                               | Reference            | 333 (92.5%)                              | 0.99 ( 0.88- 1.12)   | 12,662 (94.6%)                                   | 1.03 ( 0.97- 1.08)   |
| S:Y505H            | 1,643 (90.0%)                               | Reference            | 334 (92.8%)                              | 0.99 ( 0.88- 1.12)   | 12,699 (94.9%)                                   | 1.03 ( 0.97- 1.08)   |
| ORF1A:L3027F       | 844 (46.2%)                                 | Reference            | 253 (70.3%)                              | 1.00 ( 0.87- 1.16)   | 9,562 (71.5%)                                    | 1.03 ( 0.96- 1.11)   |
| ORF1B:F685Y        | 693 (38.0%)                                 | Reference            | 137 (38.1%)                              | 1.01 ( 0.84- 1.21)   | 5,570 (41.6%)                                    | 1.03 ( 0.95- 1.12)   |
| ORF1A:F3677L       | 767 (42.0%)                                 | Reference            | 223 (61.9%)                              | 0.98 ( 0.84- 1.14)   | 8,689 (64.9%)                                    | 1.03 ( 0.95- 1.11)   |
| S:G496S            | 802 (43.9%)                                 | Reference            | 82 (22.8%)                               | 0.99 ( 0.79- 1.25)   | 3,188 (23.8%)                                    | 1.03 ( 0.95- 1.11)   |
| S:H69L             | 238 (13.0%)                                 | Reference            | 15 ( 4.2%)                               | 0.61 ( 0.36- 1.03)   | 952 ( 7.1%)                                      | 1.03 ( 0.88- 1.19)   |
| S:S704L            | 141 ( 7.7%)                                 | Reference            | 38 (10.6%)                               | 0.96 ( 0.67- 1.38)   | 1,630 (12.2%)                                    | 1.03 ( 0.87- 1.24)   |
| S:N501Y            | 1,652 (90.5%)                               | Reference            | 334 (92.8%)                              | 0.99 ( 0.88- 1.11)   | 12,716 (95.0%)                                   | 1.02 ( 0.97- 1.08)   |

| SNP             | Not vaccinated, no recorded prior infection |                      | Not vaccinated, recorded prior infection |                      | Vaccinated, regardless of prior infection status |                      |
|-----------------|---------------------------------------------|----------------------|------------------------------------------|----------------------|--------------------------------------------------|----------------------|
|                 | N (%)                                       | Adjusted RR (95% CI) | N (%)                                    | Adjusted RR (95% CI) | N (%)                                            | Adjusted RR (95% CI) |
| S:Q498R         | 1,652 (90.5%)                               | Reference            | 332 (92.2%)                              | 0.98 ( 0.87- 1.11)   | 12,695 (94.9%)                                   | 1.02 ( 0.97- 1.08)   |
| S:S477N         | 1,612 (88.3%)                               | Reference            | 326 (90.6%)                              | 0.98 ( 0.87- 1.10)   | 12,528 (93.6%)                                   | 1.02 ( 0.97- 1.08)   |
| S:T478K         | 1,643 (90.0%)                               | Reference            | 331 (91.9%)                              | 0.98 ( 0.87- 1.11)   | 12,651 (94.5%)                                   | 1.02 ( 0.97- 1.08)   |
| ORF1A:S135R     | 862 (47.2%)                                 | Reference            | 254 (70.6%)                              | 0.98 ( 0.86- 1.13)   | 9,651 (72.1%)                                    | 1.02 ( 0.95- 1.10)   |
| ORF1A:T842I     | 862 (47.2%)                                 | Reference            | 255 (70.8%)                              | 0.99 ( 0.86- 1.14)   | 9,632 (72.0%)                                    | 1.02 ( 0.95- 1.10)   |
| ORF1B:R1315C    | 868 (47.6%)                                 | Reference            | 259 (71.9%)                              | 1.00 ( 0.87- 1.15)   | 9,701 (72.5%)                                    | 1.02 ( 0.95- 1.10)   |
| S:T376A         | 860 (47.1%)                                 | Reference            | 257 (71.4%)                              | 1.00 ( 0.87- 1.15)   | 9,602 (71.8%)                                    | 1.02 ( 0.95- 1.10)   |
| S:V213G         | 863 (47.3%)                                 | Reference            | 257 (71.4%)                              | 0.99 ( 0.86- 1.14)   | 9,670 (72.3%)                                    | 1.02 ( 0.95- 1.10)   |
| N:S413R         | 866 (47.5%)                                 | Reference            | 257 (71.4%)                              | 0.99 ( 0.86- 1.14)   | 9,672 (72.3%)                                    | 1.02 ( 0.95- 1.09)   |
| ORF1A:T3090I    | 866 (47.5%)                                 | Reference            | 258 (71.7%)                              | 1.00 ( 0.87- 1.14)   | 9,686 (72.4%)                                    | 1.02 ( 0.95- 1.09)   |
| ORF1B:T2163I    | 865 (47.4%)                                 | Reference            | 258 (71.7%)                              | 1.00 ( 0.87- 1.14)   | 9,654 (72.1%)                                    | 1.02 ( 0.95- 1.09)   |
| ORF3A:T223I     | 865 (47.4%)                                 | Reference            | 257 (71.4%)                              | 1.00 ( 0.87- 1.15)   | 9,668 (72.3%)                                    | 1.02 ( 0.95- 1.09)   |
| S:D405N         | 858 (47.0%)                                 | Reference            | 256 (71.1%)                              | 1.00 ( 0.87- 1.15)   | 9,556 (71.4%)                                    | 1.02 ( 0.95- 1.09)   |
| S:Q493R         | 1,141 (62.5%)                               | Reference            | 145 (40.3%)                              | 0.92 ( 0.78- 1.10)   | 6,743 (50.4%)                                    | 1.02 ( 0.95- 1.09)   |
| S:T19I          | 864 (47.3%)                                 | Reference            | 257 (71.4%)                              | 0.99 ( 0.86- 1.14)   | 9,667 (72.2%)                                    | 1.02 ( 0.95- 1.09)   |
| ORF6:D61L       | 424 (23.2%)                                 | Reference            | 91 (25.3%)                               | 0.91 ( 0.72- 1.14)   | 4,440 (33.2%)                                    | 1.02 ( 0.92- 1.13)   |
| S:V70I          | 1,078 (59.1%)                               | Reference            | 229 (63.6%)                              | 1.03 ( 0.89- 1.19)   | 7,707 (57.6%)                                    | 1.01 ( 0.95- 1.08)   |
| S:A21764-TACATG | 1,477 (80.9%)                               | Reference            | 295 (81.9%)                              | 1.04 ( 0.92- 1.18)   | 9,809 (73.3%)                                    | 1.01 ( 0.95- 1.07)   |
| ORF1A:G1307S    | 866 (47.5%)                                 | Reference            | 258 (71.7%)                              | 1.00 ( 0.87- 1.14)   | 9,633 (72.0%)                                    | 1.01 ( 0.94- 1.09)   |
| S:G142D         | 889 (48.7%)                                 | Reference            | 257 (71.4%)                              | 0.98 ( 0.85- 1.13)   | 9,732 (72.7%)                                    | 1.01 ( 0.94- 1.08)   |
| S:L24S          | 710 (38.9%)                                 | Reference            | 213 (59.2%)                              | 1.01 ( 0.87- 1.18)   | 7,962 (59.5%)                                    | 1.01 ( 0.93- 1.09)   |
| S:R408S         | 705 (38.6%)                                 | Reference            | 217 (60.3%)                              | 1.01 ( 0.87- 1.18)   | 7,727 (57.7%)                                    | 1.01 ( 0.93- 1.09)   |
| M:D3N           | 453 (24.8%)                                 | Reference            | 163 (45.3%)                              | 1.01 ( 0.85- 1.21)   | 5,285 (39.5%)                                    | 1.01 ( 0.92- 1.12)   |
| S:L452R         | 433 (23.7%)                                 | Reference            | 153 (42.5%)                              | 1.02 ( 0.85- 1.23)   | 4,878 (36.5%)                                    | 1.01 ( 0.92- 1.12)   |
| ORF1A:S3675T    | 527 (28.9%)                                 | Reference            | 143 (39.7%)                              | 0.96 ( 0.80- 1.16)   | 5,891 (44.0%)                                    | 1.01 ( 0.92- 1.10)   |
| S:A27S          | 207 (11.3%)                                 | Reference            | 73 (20.3%)                               | 1.07 ( 0.82- 1.39)   | 2,309 (17.3%)                                    | 1.01 ( 0.87- 1.17)   |
| S:L452Q         | 99 ( 5.4%)                                  | Reference            | 28 ( 7.8%)                               | 0.96 ( 0.63- 1.47)   | 1,116 ( 8.3%)                                    | 1.01 ( 0.82- 1.25)   |
| ORF1A:L3201F    | 365 (20.0%)                                 | Reference            | 72 (20.0%)                               | 0.88 ( 0.69- 1.14)   | 3,801 (28.4%)                                    | 1.00 ( 0.89- 1.11)   |
| S:N440K         | 1,221 (66.9%)                               | Reference            | 251 (69.7%)                              | 0.97 ( 0.85- 1.11)   | 9,418 (70.4%)                                    | 0.99 ( 0.93- 1.05)   |
| ORF1A:K856R     | 954 (52.3%)                                 | Reference            | 103 (28.6%)                              | 1.05 ( 0.86- 1.29)   | 3,747 (28.0%)                                    | 0.99 ( 0.92- 1.07)   |
| S:A67V          | 974 (53.4%)                                 | Reference            | 109 (30.3%)                              | 1.08 ( 0.88- 1.31)   | 3,848 (28.8%)                                    | 0.99 ( 0.92- 1.06)   |
| S:L981F         | 972 (53.3%)                                 | Reference            | 107 (29.7%)                              | 1.06 ( 0.87- 1.29)   | 3,830 (28.6%)                                    | 0.99 ( 0.92- 1.06)   |
| S:T547K         | 966 (52.9%)                                 | Reference            | 105 (29.2%)                              | 1.06 ( 0.86- 1.29)   | 3,784 (28.3%)                                    | 0.99 ( 0.92- 1.06)   |
| S:G446S         | 567 (31.1%)                                 | Reference            | 53 (14.7%)                               | 0.91 ( 0.68- 1.20)   | 2,220 (16.6%)                                    | 0.99 ( 0.90- 1.09)   |

| SNP                | Not vaccinated, no recorded prior infection |                      | Not vaccinated, recorded prior infection |                      | Vaccinated, regardless of prior infection status |                      |
|--------------------|---------------------------------------------|----------------------|------------------------------------------|----------------------|--------------------------------------------------|----------------------|
|                    | N (%)                                       | Adjusted RR (95% CI) | N (%)                                    | Adjusted RR (95% CI) | N (%)                                            | Adjusted RR (95% CI) |
| ORF1A:P1693R       | 119 ( 6.5%)                                 | Reference            | 25 ( 6.9%)                               | 1.06 ( 0.68- 1.63)   | 790 ( 5.9%)                                      | 0.99 ( 0.81- 1.21)   |
| ORF1A:A2710T       | 978 (53.6%)                                 | Reference            | 110 (30.6%)                              | 1.08 ( 0.88- 1.31)   | 3,878 (29.0%)                                    | 0.98 ( 0.91- 1.06)   |
| ORF1A:I3758V       | 974 (53.4%)                                 | Reference            | 109 (30.3%)                              | 1.08 ( 0.88- 1.31)   | 3,834 (28.7%)                                    | 0.98 ( 0.91- 1.06)   |
| S:G21986-GTGTTTATT | 967 (53.0%)                                 | Reference            | 106 (29.4%)                              | 1.06 ( 0.87- 1.30)   | 3,767 (28.2%)                                    | 0.98 ( 0.91- 1.06)   |
| S:T95I             | 974 (53.4%)                                 | Reference            | 108 (30.0%)                              | 1.07 ( 0.88- 1.30)   | 3,839 (28.7%)                                    | 0.98 ( 0.91- 1.06)   |
| M:D3G              | 965 (52.9%)                                 | Reference            | 106 (29.4%)                              | 1.05 ( 0.86- 1.29)   | 3,779 (28.2%)                                    | 0.98 ( 0.91- 1.05)   |
| S:R346K            | 660 (36.2%)                                 | Reference            | 89 (24.7%)                               | 1.28 ( 1.03- 1.60)   | 2,600 (19.4%)                                    | 0.98 ( 0.90- 1.07)   |
| S:N856K            | 986 (54.0%)                                 | Reference            | 109 (30.3%)                              | 1.06 ( 0.87- 1.29)   | 3,860 (28.8%)                                    | 0.97 ( 0.90- 1.05)   |
| ORF1A:L3674F       | 521 (28.5%)                                 | Reference            | 56 (15.6%)                               | 1.05 ( 0.80- 1.38)   | 2,013 (15.0%)                                    | 0.95 ( 0.86- 1.05)   |
| N:D343G            | 160 ( 8.8%)                                 | Reference            | 10 ( 2.8%)                               | 0.59 ( 0.31- 1.11)   | 624 ( 4.7%)                                      | 0.90 ( 0.75- 1.08)   |
| N:S33F             | 93 ( 5.1%)                                  | Reference            | 44 (12.2%)                               | 1.34 ( 0.94- 1.92)   | 974 ( 7.3%)                                      | 0.89 ( 0.71- 1.11)   |
| ORF1A:S2083I       | 308 (16.9%)                                 | Reference            | 33 ( 9.2%)                               | 1.06 ( 0.74- 1.53)   | 1,082 ( 8.1%)                                    | 0.87 ( 0.76- 1.00)   |
| ORF1A:L2084I       | 255 (14.0%)                                 | Reference            | 22 ( 6.1%)                               | 0.90 ( 0.58- 1.39)   | 865 ( 6.5%)                                      | 0.84 ( 0.72- 0.97)   |

<sup>1</sup> Poisson regression models to assess the association of breakthrough infection with each individual mutation adjusting for age, sex, race/ethnicity, Charlson comorbidity index score, and month of SARS-CoV-2 infection. None of the p-values were significant after adjustment for multiple testing.

**Supplemental Table 2: Association between SNP presence and vaccine status (separating out complete and boosted) among persons included in this analysis with SARS-CoV-2 infection with Omicron variant in Northern California, January 1, 2022 – October 31, 2022 (N=15,566)**

| SNP                | Not vaccinated, no prior recorded infection | Not vaccinated, prior recorded infection (95% CI) | Primary vaccine series complete (95% CI) | Boosted (95% CI)   |
|--------------------|---------------------------------------------|---------------------------------------------------|------------------------------------------|--------------------|
| ORF1a:F143L        | Reference                                   | 1.38 ( 0.85- 2.24)                                | 1.43 ( 1.05- 1.95)                       | 1.22 ( 0.91- 1.63) |
| ORF10:L37F         | Reference                                   | 1.00 ( 0.61- 1.62)                                | 1.17 ( 0.88- 1.56)                       | 1.18 ( 0.90- 1.55) |
| S:N211I            | Reference                                   | 1.11 ( 0.84- 1.46)                                | 1.10 ( 0.98- 1.22)                       | 1.16 ( 1.04- 1.31) |
| ORF1b:N498I        | Reference                                   | 0.96 ( 0.57- 1.63)                                | 1.12 ( 0.90- 1.40)                       | 1.15 ( 0.91- 1.44) |
| N:P151S            | Reference                                   | 1.18 ( 0.75- 1.87)                                | 1.24 ( 0.94- 1.65)                       | 1.15 ( 0.88- 1.50) |
| ORF1a:F3604L       | Reference                                   | 0.99 ( 0.59- 1.65)                                | 0.97 ( 0.77- 1.22)                       | 1.12 ( 0.89- 1.41) |
| S:C1254*           | Reference                                   | 1.15 ( 0.97- 1.37)                                | 1.10 ( 1.01- 1.21)                       | 1.11 ( 1.01- 1.22) |
| S:D1259H           | Reference                                   | 1.06 ( 0.87- 1.30)                                | 1.06 ( 0.96- 1.17)                       | 1.11 ( 1.00- 1.22) |
| S:T76I             | Reference                                   | 1.25 ( 0.80- 1.96)                                | 1.05 ( 0.79- 1.41)                       | 1.09 ( 0.83- 1.42) |
| N:S33C             | Reference                                   | 1.07 ( 0.79- 1.45)                                | 1.06 ( 0.90- 1.25)                       | 1.07 ( 0.91- 1.25) |
| S:S371P            | Reference                                   | 1.10 ( 0.88- 1.36)                                | 1.04 ( 0.95- 1.13)                       | 1.06 ( 0.96- 1.16) |
| ORF1b:F685Y        | Reference                                   | 1.01 ( 0.84- 1.22)                                | 1.02 ( 0.93- 1.11)                       | 1.05 ( 0.96- 1.15) |
| S:T22204+GAGCCAGAA | Reference                                   | 1.07 ( 0.85- 1.34)                                | 1.06 ( 0.97- 1.16)                       | 1.05 ( 0.95- 1.15) |
| N:S33G             | Reference                                   | 0.97 ( 0.86- 1.10)                                | 1.03 ( 0.97- 1.09)                       | 1.04 ( 0.98- 1.11) |
| S:S371F            | Reference                                   | 1.02 ( 0.91- 1.15)                                | 1.03 ( 0.97- 1.09)                       | 1.04 ( 0.98- 1.10) |
| S:S373P            | Reference                                   | 1.02 ( 0.91- 1.15)                                | 1.03 ( 0.97- 1.09)                       | 1.04 ( 0.98- 1.10) |
| S:S375F            | Reference                                   | 1.03 ( 0.91- 1.15)                                | 1.03 ( 0.97- 1.09)                       | 1.04 ( 0.98- 1.10) |
| ORF1a:L3027F       | Reference                                   | 1.00 ( 0.87- 1.16)                                | 1.02 ( 0.95- 1.11)                       | 1.04 ( 0.96- 1.12) |
| S:F486V            | Reference                                   | 1.04 ( 0.88- 1.23)                                | 1.03 ( 0.93- 1.14)                       | 1.04 ( 0.95- 1.15) |
| S:G22193-ATT       | Reference                                   | 1.07 ( 0.86- 1.34)                                | 1.06 ( 0.97- 1.16)                       | 1.04 ( 0.95- 1.15) |
| S:E484A            | Reference                                   | 0.99 ( 0.88- 1.12)                                | 1.02 ( 0.97- 1.08)                       | 1.03 ( 0.97- 1.09) |
| S:N501Y            | Reference                                   | 0.99 ( 0.88- 1.11)                                | 1.02 ( 0.97- 1.08)                       | 1.03 ( 0.97- 1.09) |
| S:S477N            | Reference                                   | 0.98 ( 0.87- 1.10)                                | 1.02 ( 0.97- 1.09)                       | 1.03 ( 0.97- 1.09) |
| S:T478K            | Reference                                   | 0.98 ( 0.87- 1.11)                                | 1.02 ( 0.96- 1.08)                       | 1.03 ( 0.97- 1.09) |
| S:Y505H            | Reference                                   | 0.99 ( 0.88- 1.12)                                | 1.03 ( 0.97- 1.09)                       | 1.03 ( 0.97- 1.09) |
| S:K417N            | Reference                                   | 1.03 ( 0.90- 1.18)                                | 1.03 ( 0.96- 1.10)                       | 1.03 ( 0.96- 1.10) |
| ORF1a:G3676S       | Reference                                   | 1.02 ( 0.90- 1.16)                                | 1.02 ( 0.96- 1.09)                       | 1.03 ( 0.96- 1.09) |
| ORF1a:F3677L       | Reference                                   | 0.98 ( 0.84- 1.14)                                | 1.03 ( 0.95- 1.12)                       | 1.03 ( 0.95- 1.11) |
| ORF1a:V2857A       | Reference                                   | 1.37 ( 0.83- 2.27)                                | 1.16 ( 0.90- 1.50)                       | 1.03 ( 0.80- 1.33) |
| S:Q498R            | Reference                                   | 0.98 ( 0.87- 1.11)                                | 1.02 ( 0.96- 1.08)                       | 1.02 ( 0.97- 1.08) |
| N:S413R            | Reference                                   | 0.99 ( 0.86- 1.14)                                | 1.01 ( 0.93- 1.09)                       | 1.02 ( 0.95- 1.10) |
| ORF1a:G1307S       | Reference                                   | 1.00 ( 0.87- 1.14)                                | 1.01 ( 0.93- 1.09)                       | 1.02 ( 0.95- 1.10) |
| ORF1a:S135R        | Reference                                   | 0.98 ( 0.86- 1.13)                                | 1.01 ( 0.94- 1.10)                       | 1.02 ( 0.95- 1.10) |



| SNP              | Not vaccinated, no prior recorded infection | Not vaccinated, prior recorded infection (95% CI) | Primary vaccine series complete (95% CI) | Boosted (95% CI)   |
|------------------|---------------------------------------------|---------------------------------------------------|------------------------------------------|--------------------|
| ORF1a:T3090I     | Reference                                   | 1.00 ( 0.87- 1.14)                                | 1.01 ( 0.93- 1.09)                       | 1.02 ( 0.95- 1.10) |
| ORF1a:T842I      | Reference                                   | 0.99 ( 0.86- 1.14)                                | 1.01 ( 0.93- 1.09)                       | 1.02 ( 0.95- 1.10) |
| ORF1b:R1315C     | Reference                                   | 1.00 ( 0.87- 1.15)                                | 1.01 ( 0.93- 1.09)                       | 1.02 ( 0.95- 1.10) |
| ORF1b:T2163I     | Reference                                   | 1.00 ( 0.87- 1.15)                                | 1.01 ( 0.93- 1.09)                       | 1.02 ( 0.95- 1.10) |
| ORF3a:T223I      | Reference                                   | 1.00 ( 0.87- 1.15)                                | 1.01 ( 0.93- 1.09)                       | 1.02 ( 0.95- 1.10) |
| S:D405N          | Reference                                   | 1.00 ( 0.87- 1.15)                                | 1.01 ( 0.93- 1.09)                       | 1.02 ( 0.95- 1.10) |
| S:T19I           | Reference                                   | 0.99 ( 0.86- 1.14)                                | 1.01 ( 0.93- 1.09)                       | 1.02 ( 0.95- 1.10) |
| S:T376A          | Reference                                   | 1.00 ( 0.87- 1.15)                                | 1.01 ( 0.93- 1.09)                       | 1.02 ( 0.95- 1.10) |
| S:V213G          | Reference                                   | 0.99 ( 0.86- 1.14)                                | 1.01 ( 0.94- 1.10)                       | 1.02 ( 0.95- 1.10) |
| S:Q493R          | Reference                                   | 0.92 ( 0.78- 1.10)                                | 1.02 ( 0.95- 1.09)                       | 1.02 ( 0.95- 1.09) |
| M:D3N            | Reference                                   | 1.01 ( 0.85- 1.21)                                | 0.99 ( 0.89- 1.11)                       | 1.02 ( 0.93- 1.13) |
| S:G496S          | Reference                                   | 0.99 ( 0.79- 1.25)                                | 1.03 ( 0.95- 1.12)                       | 1.02 ( 0.93- 1.12) |
| orf6:d61I        | Reference                                   | 0.91 ( 0.72- 1.14)                                | 1.01 ( 0.90- 1.13)                       | 1.02 ( 0.92- 1.14) |
| S:G142D          | Reference                                   | 0.98 ( 0.85- 1.13)                                | 1.00 ( 0.92- 1.08)                       | 1.01 ( 0.94- 1.09) |
| S:V70I           | Reference                                   | 1.03 ( 0.89- 1.19)                                | 1.02 ( 0.95- 1.10)                       | 1.01 ( 0.94- 1.08) |
| S:L24S           | Reference                                   | 1.01 ( 0.87- 1.18)                                | 1.01 ( 0.93- 1.10)                       | 1.01 ( 0.93- 1.10) |
| S:R408S          | Reference                                   | 1.01 ( 0.87- 1.18)                                | 1.00 ( 0.91- 1.09)                       | 1.01 ( 0.93- 1.10) |
| ORF1a:S3675T     | Reference                                   | 0.97 ( 0.80- 1.16)                                | 1.00 ( 0.90- 1.11)                       | 1.01 ( 0.92- 1.11) |
| S:L452R          | Reference                                   | 1.02 ( 0.85- 1.23)                                | 1.01 ( 0.91- 1.13)                       | 1.01 ( 0.91- 1.13) |
| S:V70L           | Reference                                   | 0.89 ( 0.62- 1.28)                                | 1.06 ( 0.91- 1.23)                       | 1.01 ( 0.86- 1.19) |
| S:H69L           | Reference                                   | 0.61 ( 0.36- 1.03)                                | 1.03 ( 0.88- 1.21)                       | 1.01 ( 0.85- 1.20) |
| S:S704L          | Reference                                   | 0.96 ( 0.67- 1.37)                                | 1.09 ( 0.90- 1.32)                       | 1.01 ( 0.84- 1.21) |
| S:A21764-TACATG  | Reference                                   | 1.04 ( 0.92- 1.18)                                | 1.01 ( 0.95- 1.07)                       | 1.00 ( 0.94- 1.07) |
| ORF1a:L3201F     | Reference                                   | 0.88 ( 0.69- 1.14)                                | 0.99 ( 0.88- 1.12)                       | 1.00 ( 0.89- 1.12) |
| S:A27S           | Reference                                   | 1.07 ( 0.82- 1.39)                                | 1.03 ( 0.88- 1.21)                       | 1.00 ( 0.86- 1.16) |
| S:N440K          | Reference                                   | 0.97 ( 0.84- 1.11)                                | 0.99 ( 0.93- 1.06)                       | 0.99 ( 0.92- 1.05) |
| S:L452Q          | Reference                                   | 0.96 ( 0.63- 1.46)                                | 1.05 ( 0.84- 1.33)                       | 0.99 ( 0.79- 1.23) |
| ORF1a:K856R      | Reference                                   | 1.05 ( 0.86- 1.29)                                | 1.00 ( 0.92- 1.08)                       | 0.98 ( 0.90- 1.06) |
| S:L981F          | Reference                                   | 1.06 ( 0.87- 1.29)                                | 0.99 ( 0.92- 1.07)                       | 0.98 ( 0.90- 1.06) |
| S:G446S          | Reference                                   | 0.91 ( 0.68- 1.20)                                | 1.00 ( 0.90- 1.11)                       | 0.98 ( 0.88- 1.10) |
| S:A67V           | Reference                                   | 1.08 ( 0.88- 1.31)                                | 1.00 ( 0.92- 1.08)                       | 0.97 ( 0.89- 1.06) |
| S:T547K          | Reference                                   | 1.06 ( 0.86- 1.29)                                | 0.99 ( 0.92- 1.07)                       | 0.97 ( 0.89- 1.06) |
| ORF1a:A2710T     | Reference                                   | 1.08 ( 0.88- 1.31)                                | 0.99 ( 0.91- 1.07)                       | 0.97 ( 0.89- 1.05) |
| ORF1a:I3758V     | Reference                                   | 1.08 ( 0.88- 1.31)                                | 0.99 ( 0.92- 1.07)                       | 0.97 ( 0.89- 1.05) |
| S:G21986-GTGTATT | Reference                                   | 1.06 ( 0.87- 1.30)                                | 0.99 ( 0.92- 1.07)                       | 0.97 ( 0.89- 1.05) |

| SNP          | Not vaccinated, no prior recorded infection | Not vaccinated, prior recorded infection (95% CI) | Primary vaccine series complete (95% CI) | Boosted (95% CI)   |
|--------------|---------------------------------------------|---------------------------------------------------|------------------------------------------|--------------------|
| S:T95I       | Reference                                   | 1.07 ( 0.88- 1.31)                                | 0.99 ( 0.92- 1.07)                       | 0.97 ( 0.89- 1.05) |
| S:R346K      | Reference                                   | 1.28 ( 1.03- 1.60)                                | 0.99 ( 0.90- 1.09)                       | 0.97 ( 0.88- 1.08) |
| ORF1a:P1693R | Reference                                   | 1.05 ( 0.68- 1.63)                                | 1.01 ( 0.81- 1.26)                       | 0.97 ( 0.78- 1.21) |
| M:D3G        | Reference                                   | 1.05 ( 0.86- 1.29)                                | 0.99 ( 0.91- 1.07)                       | 0.96 ( 0.88- 1.05) |
| S:N856K      | Reference                                   | 1.06 ( 0.87- 1.29)                                | 0.98 ( 0.91- 1.06)                       | 0.96 ( 0.88- 1.04) |
| N:D343G      | Reference                                   | 0.59 ( 0.31- 1.11)                                | 0.87 ( 0.72- 1.06)                       | 0.95 ( 0.77- 1.16) |
| ORF1a:L3674F | Reference                                   | 1.05 ( 0.80- 1.39)                                | 0.96 ( 0.87- 1.07)                       | 0.94 ( 0.83- 1.05) |
| n:s33f       | Reference                                   | 1.34 ( 0.94- 1.92)                                | 0.94 ( 0.73- 1.20)                       | 0.86 ( 0.69- 1.08) |
| ORF1a:S2083I | Reference                                   | 1.07 ( 0.74- 1.53)                                | 0.92 ( 0.80- 1.06)                       | 0.80 ( 0.68- 0.93) |
| ORF1a:L2084I | Reference                                   | 0.90 ( 0.58- 1.40)                                | 0.94 ( 0.81- 1.10)                       | 0.69 ( 0.58- 0.82) |

<sup>1</sup> Poisson regression models to assess the association of breakthrough infection with each individual mutation adjusting for age, sex, race/ethnicity, Charlson comorbidity index score, and month of SARS-CoV-2 infection. None of the p-values were significant after adjustment for multiple testing.

**Supplemental Table 3: Association between mutation groups<sup>1</sup> and vaccine status (separating complete and boosted) among persons included in this analysis with SARS-CoV-2 infection with Omicron variant in Northern California, January 2022-October 2022 (N=15,566)<sup>2</sup>**

| SNP or group    | Not vaccinated,<br>No prior infection | Not vaccinated,<br>Recorded prior infection |         |         | Vaccinated with complete series,<br>regardless of prior infection status |         |         | Vaccinated with more than complete series,<br>regardless of prior infection status |         |         |
|-----------------|---------------------------------------|---------------------------------------------|---------|---------|--------------------------------------------------------------------------|---------|---------|------------------------------------------------------------------------------------|---------|---------|
|                 |                                       | aRR (95% CI)                                | p (raw) | p (FDR) | aRR (95% CI)                                                             | p (raw) | p (FDR) | aRR (95% CI)                                                                       | p (raw) | p (FDR) |
| ORF10:L37F      | Reference                             | 1.00 ( 0.61- 1.62)                          | 0.9854  | 0.99996 | 1.17 ( 0.88- 1.56)                                                       | 0.2897  | 0.98013 | 1.18 ( 0.90- 1.55)                                                                 | 0.2188  | 0.75760 |
| group64         | Reference                             | 1.26 ( 0.82- 1.93)                          | 0.2893  | 0.99996 | 1.31 ( 1.00- 1.71)                                                       | 0.0460  | 0.63809 | 1.17 ( 0.91- 1.51)                                                                 | 0.2127  | 0.75760 |
| ORF1b:N498I     | Reference                             | 0.96 ( 0.57- 1.63)                          | 0.8930  | 0.99996 | 1.12 ( 0.90- 1.40)                                                       | 0.3044  | 0.98013 | 1.15 ( 0.91- 1.44)                                                                 | 0.2418  | 0.75760 |
| ORF1a:F3604L    | Reference                             | 0.99 ( 0.59- 1.65)                          | 0.9670  | 0.99996 | 0.97 ( 0.77- 1.22)                                                       | 0.8029  | 0.99285 | 1.12 ( 0.89- 1.41)                                                                 | 0.3409  | 0.84737 |
| S:D1259H        | Reference                             | 1.06 ( 0.87- 1.30)                          | 0.5325  | 0.99996 | 1.06 ( 0.96- 1.17)                                                       | 0.2355  | 0.98013 | 1.11 ( 1.00- 1.22)                                                                 | 0.0437  | 0.38280 |
| group45         | Reference                             | 1.13 ( 0.96- 1.34)                          | 0.1487  | 0.99996 | 1.09 ( 1.00- 1.20)                                                       | 0.0532  | 0.63809 | 1.10 ( 1.01- 1.20)                                                                 | 0.0299  | 0.34911 |
| S:T76I          | Reference                             | 1.25 ( 0.80- 1.96)                          | 0.3213  | 0.99996 | 1.05 ( 0.79- 1.41)                                                       | 0.7269  | 0.99285 | 1.09 ( 0.83- 1.42)                                                                 | 0.5496  | 0.93632 |
| N:S33C          | Reference                             | 1.07 ( 0.79- 1.45)                          | 0.6744  | 0.99996 | 1.06 ( 0.90- 1.25)                                                       | 0.4647  | 0.98013 | 1.07 ( 0.91- 1.25)                                                                 | 0.4358  | 0.84737 |
| ORF1b:F685Y     | Reference                             | 1.01 ( 0.84- 1.22)                          | 0.9039  | 0.99996 | 1.02 ( 0.93- 1.11)                                                       | 0.7211  | 0.99285 | 1.05 ( 0.96- 1.15)                                                                 | 0.2874  | 0.77368 |
| N:S33G          | Reference                             | 0.97 ( 0.86- 1.10)                          | 0.6580  | 0.99996 | 1.03 ( 0.97- 1.09)                                                       | 0.4080  | 0.98013 | 1.04 ( 0.98- 1.11)                                                                 | 0.1683  | 0.75760 |
| group19         | Reference                             | 1.02 ( 0.91- 1.15)                          | 0.6887  | 0.99996 | 1.03 ( 0.97- 1.09)                                                       | 0.3374  | 0.98013 | 1.04 ( 0.98- 1.10)                                                                 | 0.2138  | 0.75760 |
| group25         | Reference                             | 1.04 ( 0.88- 1.23)                          | 0.6335  | 0.99996 | 1.03 ( 0.93- 1.14)                                                       | 0.5399  | 0.98077 | 1.04 ( 0.95- 1.15)                                                                 | 0.3822  | 0.84737 |
| ORF1a:G3676S    | Reference                             | 1.02 ( 0.90- 1.16)                          | 0.7164  | 0.99996 | 1.02 ( 0.96- 1.09)                                                       | 0.4624  | 0.98013 | 1.03 ( 0.96- 1.09)                                                                 | 0.4181  | 0.84737 |
| group12         | Reference                             | 0.92 ( 0.74- 1.15)                          | 0.4800  | 0.99996 | 1.01 ( 0.91- 1.13)                                                       | 0.8274  | 0.99285 | 1.03 ( 0.92- 1.14)                                                                 | 0.6258  | 0.93632 |
| ORF1a:V2857A    | Reference                             | 1.37 ( 0.83- 2.27)                          | 0.2144  | 0.99996 | 1.16 ( 0.90- 1.50)                                                       | 0.2416  | 0.98013 | 1.03 ( 0.80- 1.33)                                                                 | 0.8122  | 0.93632 |
| group11         | Reference                             | 0.99 ( 0.88- 1.11)                          | 0.8758  | 0.99996 | 1.02 ( 0.96- 1.08)                                                       | 0.4901  | 0.98013 | 1.02 ( 0.97- 1.09)                                                                 | 0.4009  | 0.84737 |
| S:Q493R         | Reference                             | 0.92 ( 0.78- 1.10)                          | 0.3606  | 0.99996 | 1.02 ( 0.95- 1.09)                                                       | 0.6369  | 0.99285 | 1.02 ( 0.95- 1.09)                                                                 | 0.6295  | 0.93632 |
| group6          | Reference                             | 0.99 ( 0.86- 1.13)                          | 0.8414  | 0.99996 | 1.00 ( 0.93- 1.08)                                                       | 0.9600  | 0.99860 | 1.01 ( 0.94- 1.09)                                                                 | 0.6974  | 0.93632 |
| S:V70I          | Reference                             | 1.03 ( 0.89- 1.19)                          | 0.6699  | 0.99996 | 1.02 ( 0.95- 1.10)                                                       | 0.5570  | 0.98077 | 1.01 ( 0.94- 1.08)                                                                 | 0.8514  | 0.93632 |
| group20         | Reference                             | 1.00 ( 0.88- 1.15)                          | 0.9439  | 0.99996 | 1.00 ( 0.94- 1.07)                                                       | 0.9986  | 0.99860 | 1.01 ( 0.94- 1.07)                                                                 | 0.8779  | 0.93632 |
| S:R408S         | Reference                             | 1.01 ( 0.87- 1.18)                          | 0.8801  | 0.99996 | 1.00 ( 0.91- 1.09)                                                       | 0.9742  | 0.99860 | 1.01 ( 0.93- 1.10)                                                                 | 0.7979  | 0.93632 |
| ORF1a:S3675T    | Reference                             | 0.97 ( 0.80- 1.16)                          | 0.7068  | 0.99996 | 1.00 ( 0.90- 1.11)                                                       | 0.9848  | 0.99860 | 1.01 ( 0.92- 1.11)                                                                 | 0.8491  | 0.93632 |
| S:V70L          | Reference                             | 0.89 ( 0.62- 1.28)                          | 0.5264  | 0.99996 | 1.06 ( 0.91- 1.23)                                                       | 0.4816  | 0.98013 | 1.01 ( 0.86- 1.19)                                                                 | 0.9096  | 0.93632 |
| S:H69L          | Reference                             | 0.61 ( 0.36- 1.03)                          | 0.0640  | 0.98819 | 1.03 ( 0.88- 1.21)                                                       | 0.6712  | 0.99285 | 1.01 ( 0.85- 1.20)                                                                 | 0.9075  | 0.93632 |
| group7          | Reference                             | 0.95 ( 0.66- 1.36)                          | 0.7696  | 0.99996 | 1.09 ( 0.90- 1.32)                                                       | 0.3774  | 0.98013 | 1.01 ( 0.84- 1.21)                                                                 | 0.9374  | 0.93741 |
| S:A21764-TACATG | Reference                             | 1.04 ( 0.92- 1.18)                          | 0.5275  | 0.99996 | 1.01 ( 0.95- 1.07)                                                       | 0.7878  | 0.99285 | 1.00 ( 0.94- 1.07)                                                                 | 0.8937  | 0.93632 |
| group26         | Reference                             | 1.06 ( 0.88- 1.29)                          | 0.5289  | 0.99996 | 0.99 ( 0.92- 1.07)                                                       | 0.7873  | 0.99285 | 0.99 ( 0.91- 1.07)                                                                 | 0.7439  | 0.93632 |
| group4          | Reference                             | 1.06 ( 0.88- 1.28)                          | 0.5447  | 0.99996 | 0.98 ( 0.91- 1.06)                                                       | 0.5721  | 0.98077 | 0.97 ( 0.89- 1.05)                                                                 | 0.4805  | 0.88512 |
| ORF1a:P1693R    | Reference                             | 1.05 ( 0.68- 1.63)                          | 0.8134  | 0.99996 | 1.01 ( 0.81- 1.26)                                                       | 0.9443  | 0.99860 | 0.97 ( 0.78- 1.21)                                                                 | 0.7922  | 0.93632 |
| N:D343G         | Reference                             | 0.59 ( 0.31- 1.11)                          | 0.1022  | 0.98819 | 0.87 ( 0.72- 1.06)                                                       | 0.1683  | 0.98013 | 0.95 ( 0.77- 1.16)                                                                 | 0.5944  | 0.93632 |
| N:S33F          | Reference                             | 1.34 ( 0.94- 1.92)                          | 0.1098  | 0.98819 | 0.94 ( 0.73- 1.20)                                                       | 0.6012  | 0.98381 | 0.86 ( 0.69- 1.08)                                                                 | 0.2069  | 0.75760 |
| ORF1a:S2083I    | Reference                             | 1.07 ( 0.74- 1.53)                          | 0.7251  | 0.99996 | 0.92 ( 0.80- 1.06)                                                       | 0.2454  | 0.98013 | 0.80 ( 0.68- 0.93)                                                                 | 0.0046  | 0.07981 |
| ORF1a:L2084I    | Reference                             | 0.90 ( 0.58- 1.40)                          | 0.6480  | 0.99996 | 0.94 ( 0.81- 1.10)                                                       | 0.4431  | 0.98013 | 0.69 ( 0.58- 0.82)                                                                 | <.0001  | 0.00095 |

<sup>1</sup> Mutations with Pearson pairwise correlation >0.70 combined into groups for analysis:

group 4: M:D3G, ORF1a:I3758V, ORF1a:K856R, S:A67V, S:G496S, S:N211I, S:N856K, S:R346K, S:S371P, S:T22204+GAGCCAGAA, S:T547K, S:T95I  
group 6: N:S413R, ORF1a:F3677L, ORF1a:G1307S, ORF1a:L3027F, ORF1a:S135R, ORF1a:T3090I, ORF1a:T842I, ORF1b:R1315C, ORF1b:T2163I, ORF3a:T223I, S:D405N, S:G142D, S:L24S, S:T19I, S:T376A, S:V213G  
group 7: S:L452Q, S:S704L  
group 11: S:E484A, S:N501Y, S:Q498R, S:S477N, S:T478K, S:Y505H  
group 12: ORF1a:L3201F, ORF6:D61L  
group 19: S:S371F, S:S373P, S:S375F  
group 20: S:K417N, S:N440K  
group 25: M:D3N, S:F486V, S:L452R  
group 26: ORF1a:A2710T, ORF1a:L3674F, S:G21986-GTGTATT, S:G22193-ATT, S:G446S, S:L981F  
group 45: S:A27S, S:C1254\*  
group 64: N:P151S, ORF1a:F143L

<sup>2</sup> Adjusted risk ratios derived from Poisson regression models to assess the association of immunity status with each mutation group adjusting for age, sex, race/ethnicity, Charlson comorbidity index score, and month of SARS-CoV-2 infection.
